# Supplementary material for: Coffee Silverskin Phytocompounds as a Novel Anti-Aging Functional Food: A Pharmacoinformatic Approach Combined with In Vitro Study
Source: MDPI journal article supplement (doi:10.3390/molecules28207037), 2023-10-11

**Table S1.** Two-way ANOVA of DPPH Inhibition Activity

| DPPH; Dunnett's multiple comparisons test | Mean Diff. | 95.00% CI of diff. | Below threshold? | Summary | Adjusted P Value |
|-------------------------------------------|------------|--------------------|------------------|---------|------------------|
| <b>Row 1 or 25 µg/mL</b>                  |            |                    |                  |         |                  |
| Trolox/Control vs. rCSE                   | -0.5600    | -2.860 to 1.740    | No               | ns      | 0.7966           |
| Trolox/Control vs. aCSE                   | 2.233      | -0.06640 to 4.533  | No               | ns      | 0.0578           |
| <b>Row 2 or 50 µg/mL</b>                  |            |                    |                  |         |                  |
| Trolox/Control vs. rCSE                   | -0.3667    | -2.666 to 1.933    | No               | ns      | 0.9055           |
| Trolox/Control vs. aCSE                   | 2.733      | 0.4336 to 5.033    | Yes              | *       | 0.0184           |
| <b>Row 3 or 100 µg/mL</b>                 |            |                    |                  |         |                  |
| Trolox/Control vs. rCSE                   | 0.6000     | -1.700 to 2.900    | No               | ns      | 0.7711           |
| Trolox/Control vs. aCSE                   | 6.467      | 4.167 to 8.766     | Yes              | ****    | <0.0001          |
| <b>Row 4 or 150 µg/mL</b>                 |            |                    |                  |         |                  |
| Trolox/Control vs. rCSE                   | 3.577      | 1.277 to 5.876     | Yes              | **      | 0.0022           |
| Trolox/Control vs. aCSE                   | 5.133      | 2.834 to 7.433     | Yes              | ****    | <0.0001          |
| <b>Row 5 or 200 µg/mL</b>                 |            |                    |                  |         |                  |
| Trolox/Control vs. rCSE                   | 0.06667    | -2.233 to 2.366    | No               | ns      | 0.9967           |
| Trolox/Control vs. aCSE                   | 2.840      | 0.5403 to 5.140    | Yes              | *       | 0.0142           |

**Table S2.** Two-way ANOVA of ABTS Inhibition Activity

| Dunnett's multiple comparisons test | Mean Diff. | 95.00% CI of diff. | Below threshold? | Summary | Adjusted P Value |
|-------------------------------------|------------|--------------------|------------------|---------|------------------|
| <b>Row 1 or 25 µg/mL</b>            |            |                    |                  |         |                  |
| Trolox/Control vs. rCSE             | 3.143      | 0.6042 to 5.683    | Yes              | *       | 0.0140           |
| Trolox/Control vs. aCSE             | 5.973      | 3.434 to 8.513     | Yes              | ****    | <0.0001          |
| <b>Row 2 or 50 µg/mL</b>            |            |                    |                  |         |                  |
| Trolox/Control vs. rCSE             | 1.970      | -0.5692 to 4.509   | No               | ns      | 0.1439           |
| Trolox/Control vs. aCSE             | 8.847      | 6.307 to 11.39     | Yes              | ****    | <0.0001          |
| <b>Row 3 or 100 µg/mL</b>           |            |                    |                  |         |                  |
| Trolox/Control vs. rCSE             | 4.877      | 2.337 to 7.416     | Yes              | ***     | 0.0002           |
| Trolox/Control vs. aCSE             | 6.973      | 4.434 to 9.513     | Yes              | ****    | <0.0001          |
| <b>Row 4 or 150 µg/mL</b>           |            |                    |                  |         |                  |
| Trolox/Control vs. rCSE             | 0.1367     | -2.403 to 2.676    | No               | ns      | 0.9886           |
| Trolox/Control vs. aCSE             | 3.773      | 1.234 to 6.313     | Yes              | **      | 0.0032           |
| <b>Row 5 or 200 µg/mL</b>           |            |                    |                  |         |                  |
| Trolox/Control vs. rCSE             | 2.403      | -0.1358 to 4.943   | No               | ns      | 0.0653           |
| Trolox/Control vs. aCSE             | 4.400      | 1.861 to 6.939     | Yes              | ***     | 0.0007           |

**Table S3.** The fully visualization from molecular docking simulation of amino acid interactions throughout the observed CSE substance

| iNOS      3E7G |           |                                                                                                                                                                                                                                                                      |
|----------------|-----------|----------------------------------------------------------------------------------------------------------------------------------------------------------------------------------------------------------------------------------------------------------------------|
| No.            | Substance | Visualization                                                                                                                                                                                                                                                        |
| Native Ligand  |           |                                                                                                                                                                                                                                                                      |
| 1              | 3E7G      | 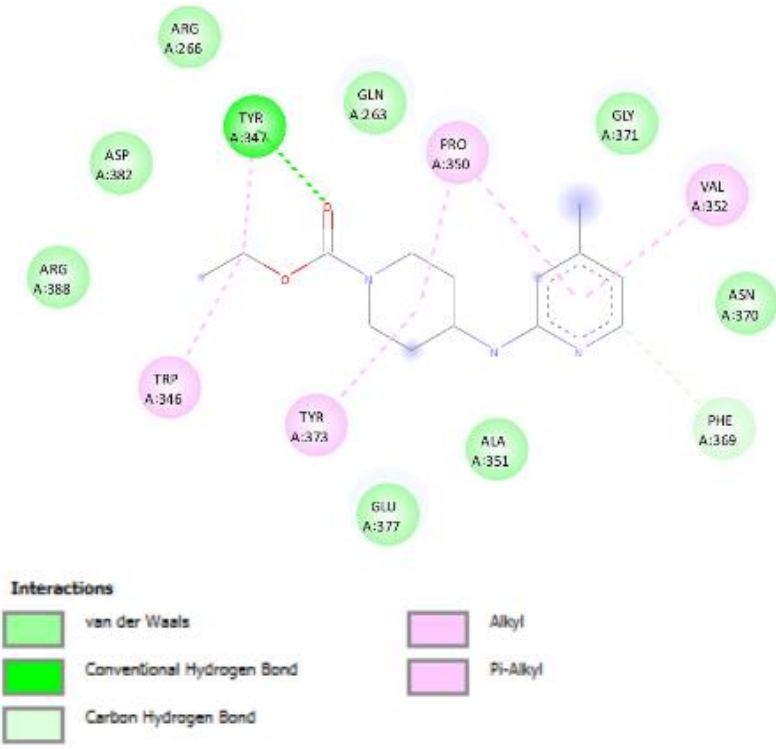 <p>Interactions</p> <ul style="list-style-type: none"><li>van der Waals</li><li>Conventional Hydrogen Bond</li><li>Carbon Hydrogen Bond</li><li>Alkyl</li><li>Pi-Alkyl</li></ul> |
| Control        |           |                                                                                                                                                                                                                                                                      |

1

S-ibuprofen

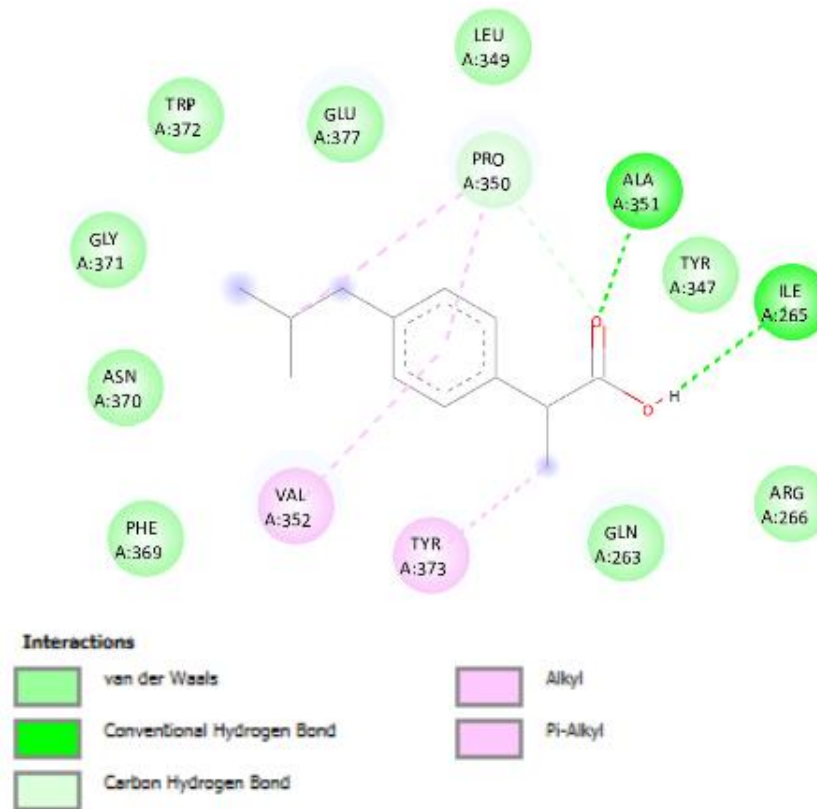

aCSE

1

Epicatechin

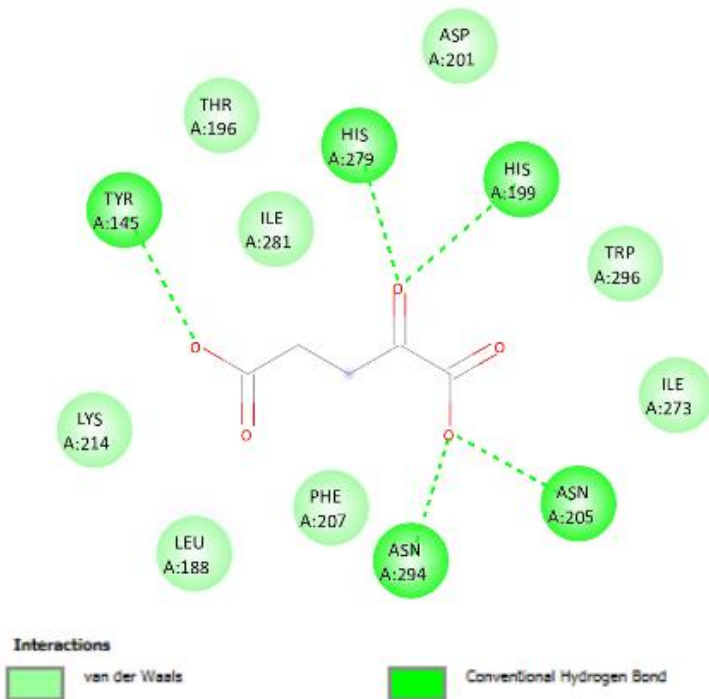

2

Gallic acid

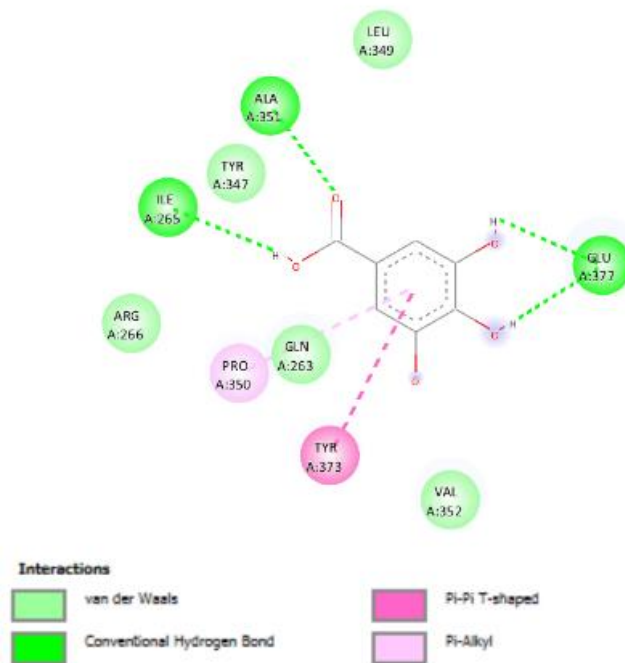

3

4-Hydroxycinnamic acid

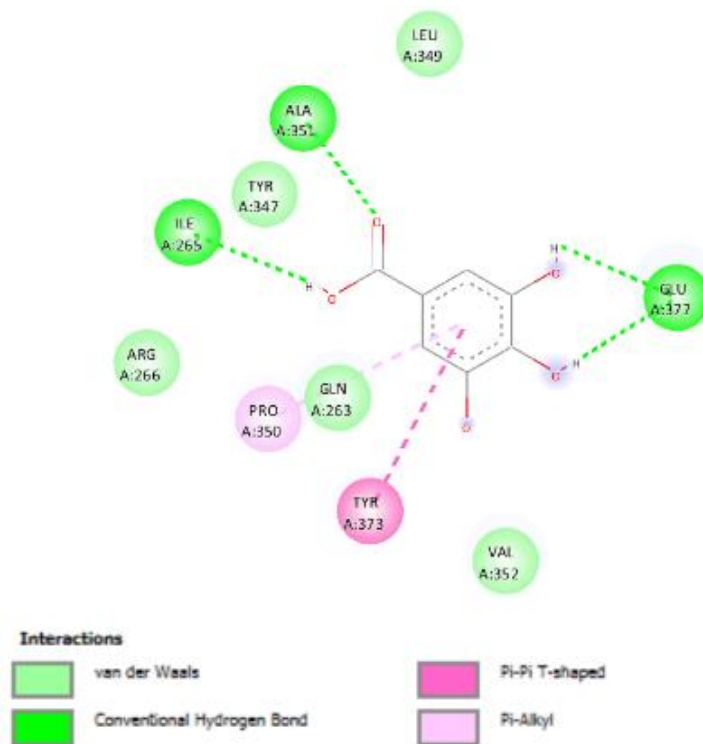

4

Kaempferol

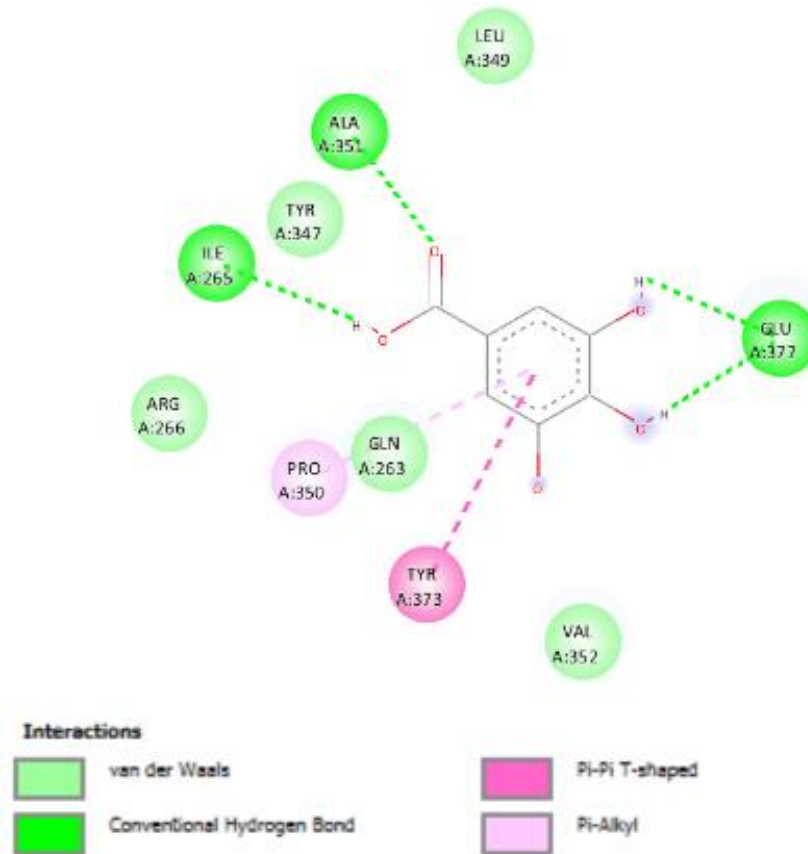



5

Quercitrin

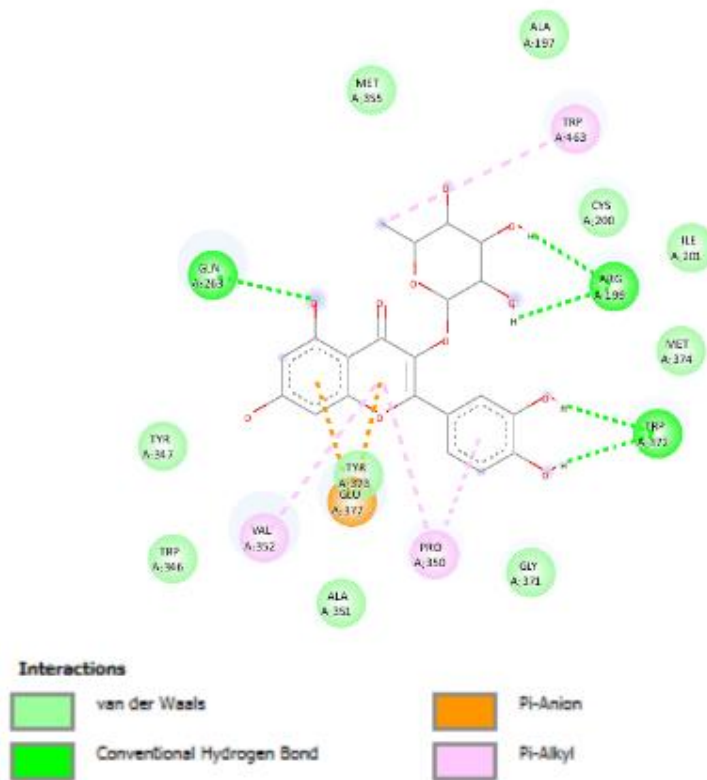

rCSE

1

Caffeic acid

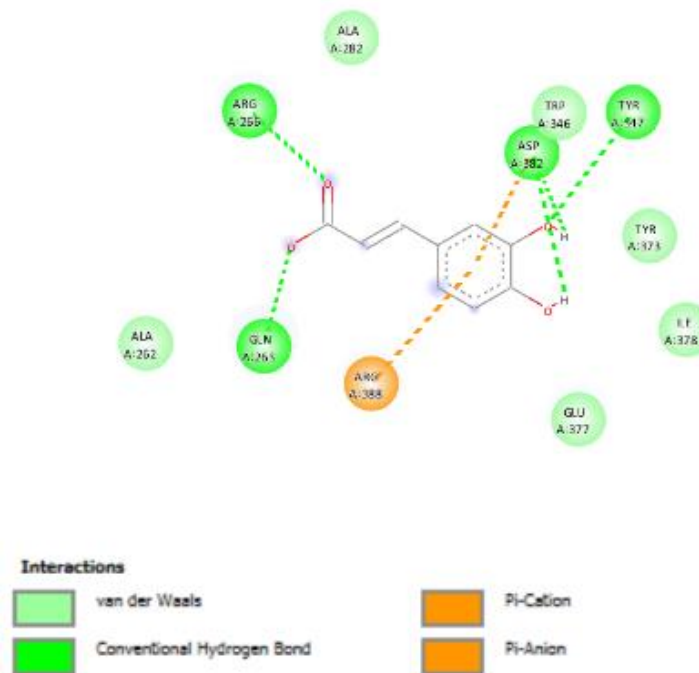

2

(+) -Catechin

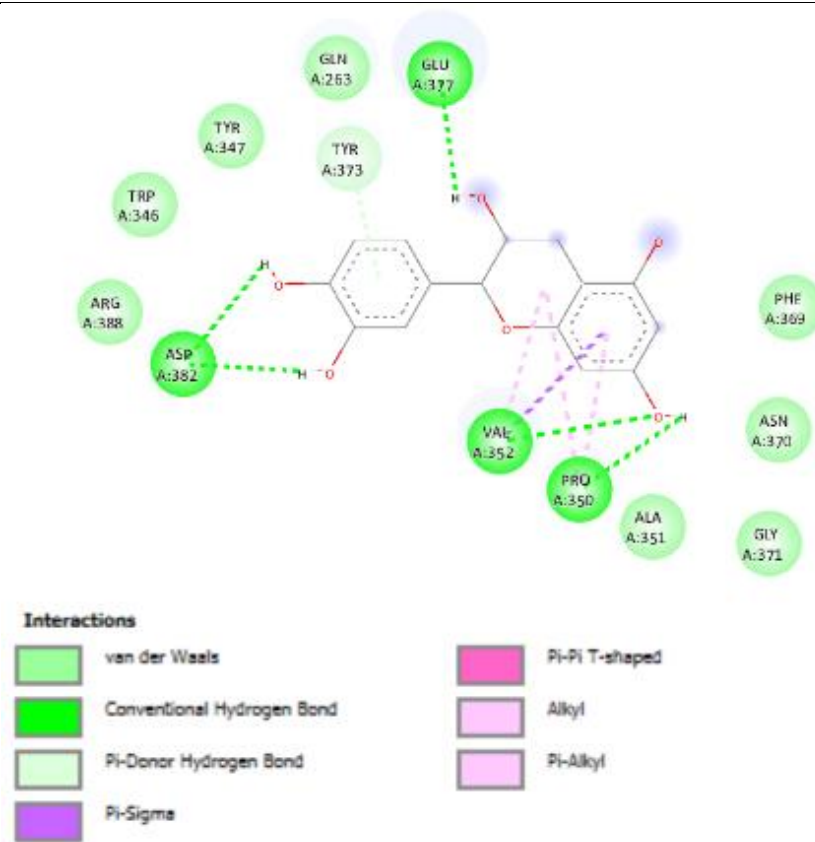

3

(2R,3S,4S,5R,6S)-2-(hydroxymethyl)-6-[7-hydroxy-3-[(2S,3R,4S,5S,6R)-3,4,5-trihydroxy-6-(hydroxymethyl)oxan-2-yl]oxy-2-(3,4,5-trihydroxyphenyl)chromenylum-5-yl]oxyoxane-3,4,5-triol

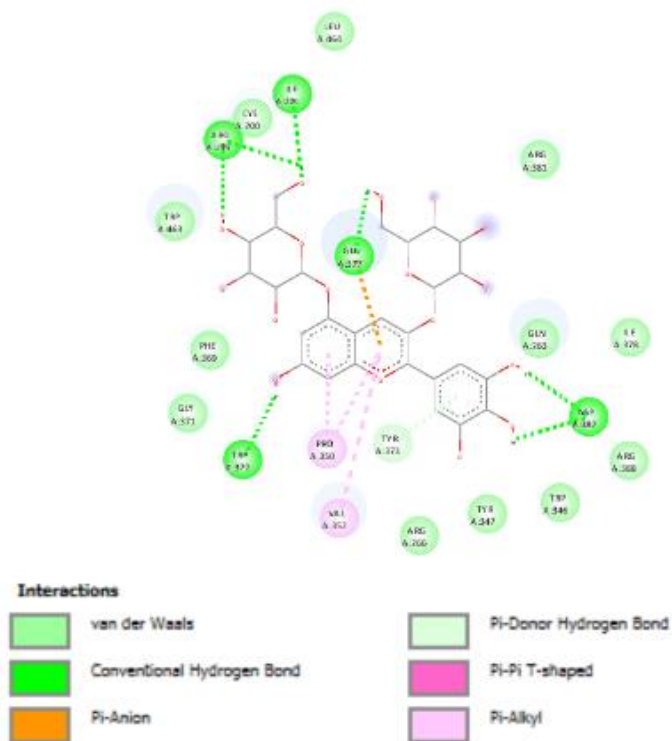

|   |          |
|---|----------|
| 4 | Naringin |
|---|----------|

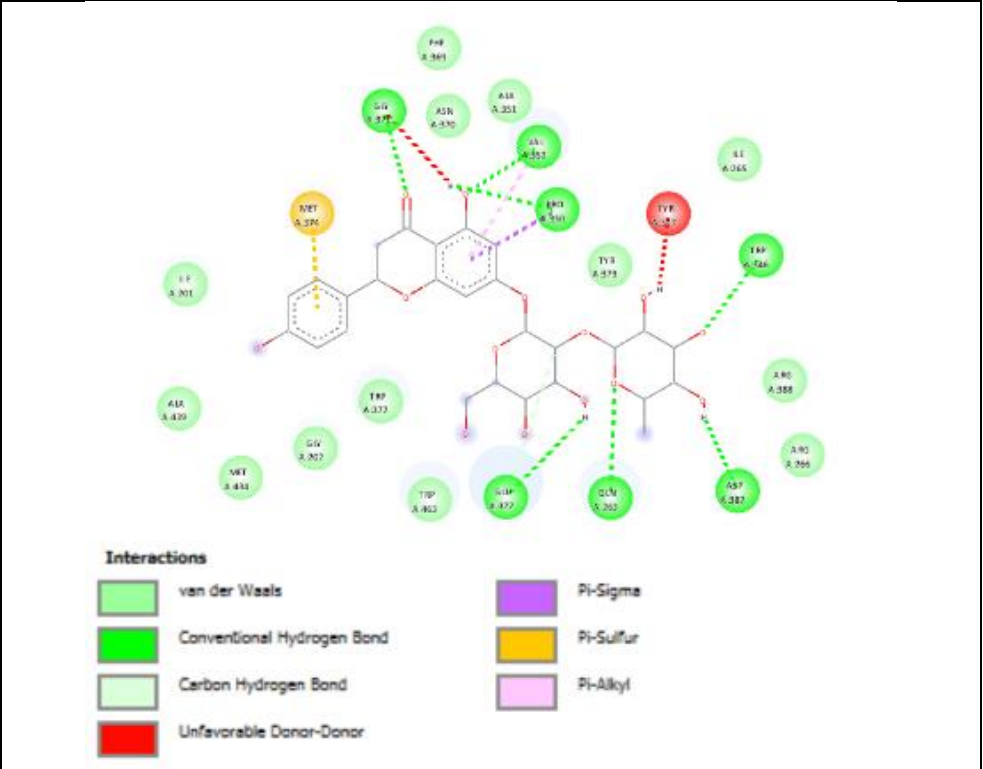

5

Rutin

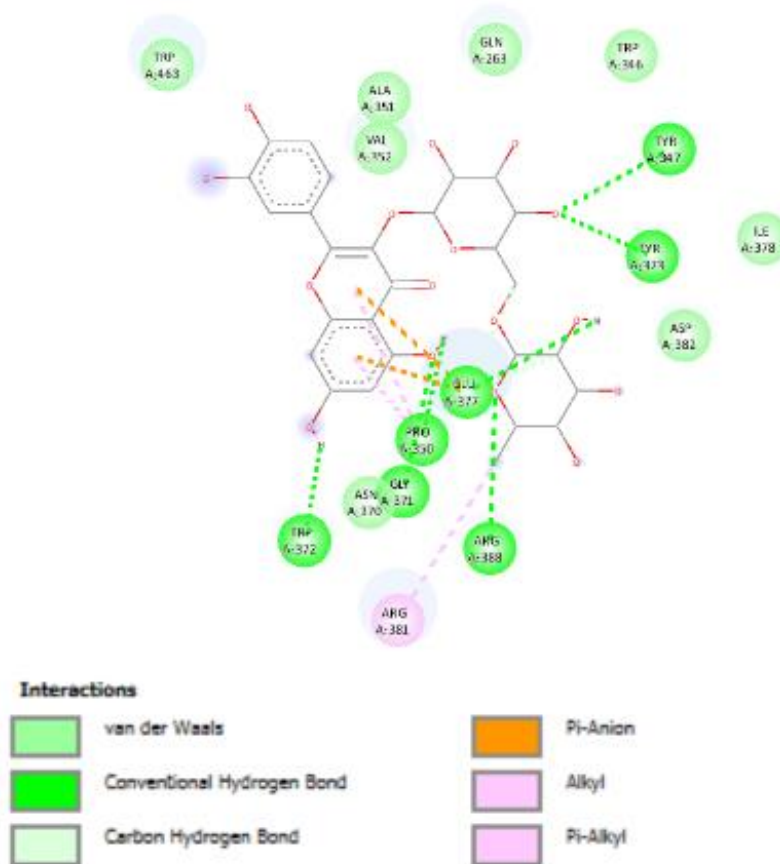

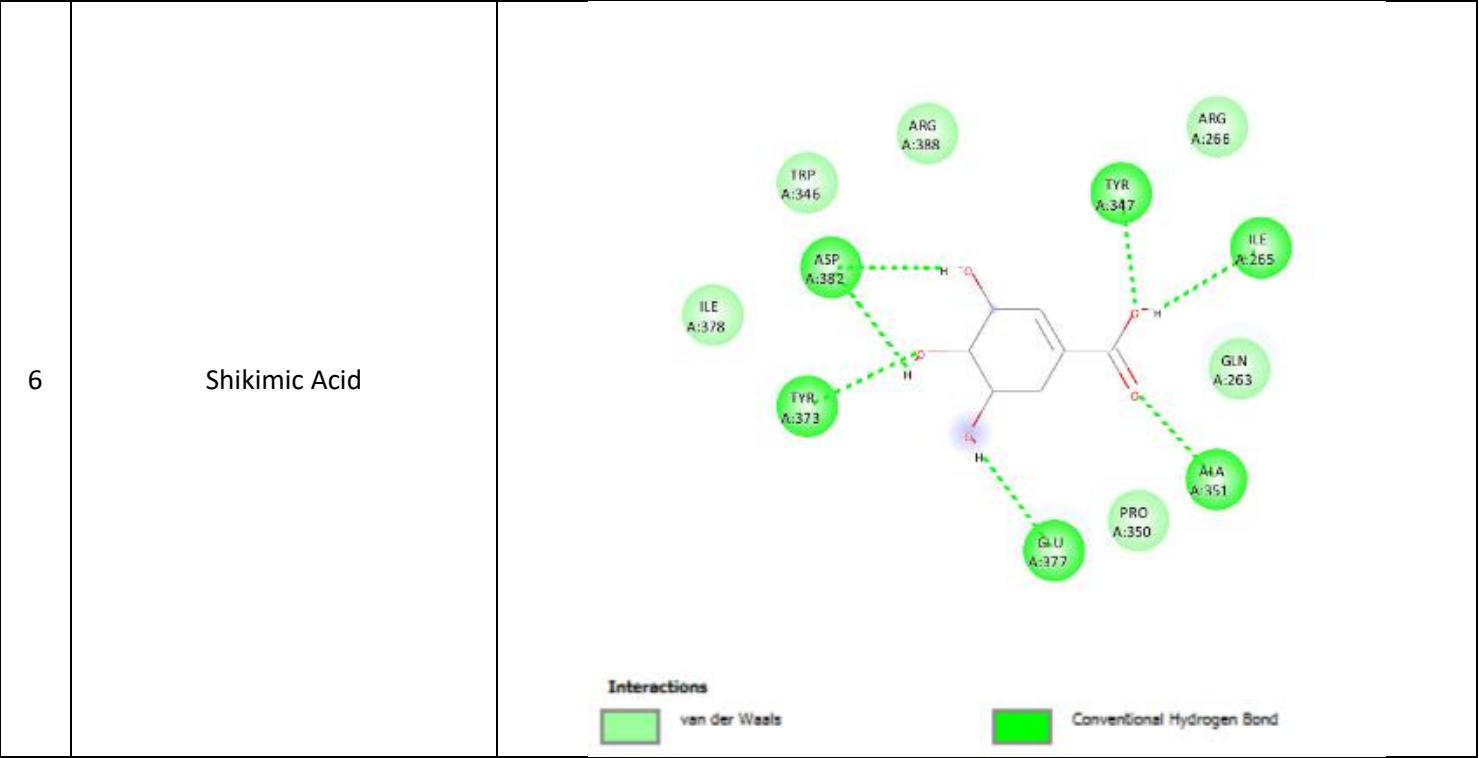

mTOR

| No. | Substance     | Visualization |
|-----|---------------|---------------|
|     | Native Ligand |               |

|                                                                                                                                                |                                                                                                                                   |                                                                                                                                                                                                                                                                                                                                                                                                                                                                                                                                                                                                                                                                                                                                                                                                                                                                                                                                                                                                                                                                                                                                                                                                   |                                                                                                                                         |                                                                                                                                |                                                                                                                                               |                                                                                                                           |                                                                                                                                                |                                                                                                                                   |                                                                                                                                |  |
|------------------------------------------------------------------------------------------------------------------------------------------------|-----------------------------------------------------------------------------------------------------------------------------------|---------------------------------------------------------------------------------------------------------------------------------------------------------------------------------------------------------------------------------------------------------------------------------------------------------------------------------------------------------------------------------------------------------------------------------------------------------------------------------------------------------------------------------------------------------------------------------------------------------------------------------------------------------------------------------------------------------------------------------------------------------------------------------------------------------------------------------------------------------------------------------------------------------------------------------------------------------------------------------------------------------------------------------------------------------------------------------------------------------------------------------------------------------------------------------------------------|-----------------------------------------------------------------------------------------------------------------------------------------|--------------------------------------------------------------------------------------------------------------------------------|-----------------------------------------------------------------------------------------------------------------------------------------------|---------------------------------------------------------------------------------------------------------------------------|------------------------------------------------------------------------------------------------------------------------------------------------|-----------------------------------------------------------------------------------------------------------------------------------|--------------------------------------------------------------------------------------------------------------------------------|--|
| 1                                                                                                                                              | 3FAP                                                                                                                              | 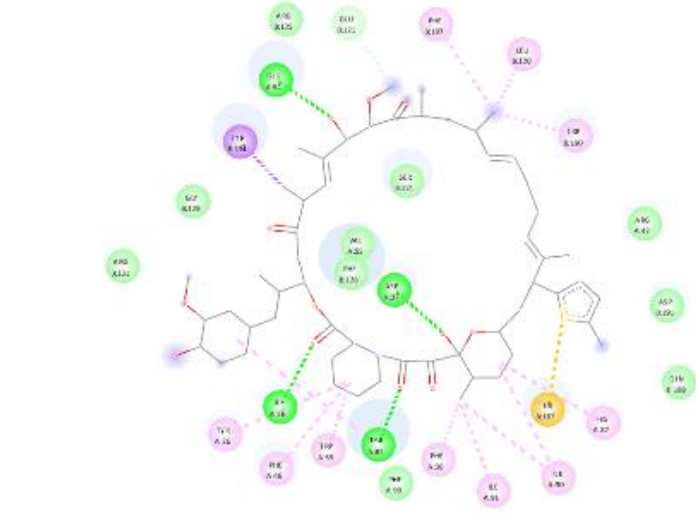 <p><b>Interactions</b></p> <table><tr><td><span style="display:inline-block; width:15px; height:15px; background-color:lightgreen; border:1px solid black;"></span> van der Waals</td><td><span style="display:inline-block; width:15px; height:15px; background-color:purple; border:1px solid black;"></span> Pi-Sigma</td></tr><tr><td><span style="display:inline-block; width:15px; height:15px; background-color:red; border:1px solid black;"></span> Conventional Hydrogen Bond</td><td><span style="display:inline-block; width:15px; height:15px; background-color:pink; border:1px solid black;"></span> Alkyl</td></tr><tr><td><span style="display:inline-block; width:15px; height:15px; background-color:lightgreen; border:1px solid black;"></span> Carbon Hydrogen Bond</td><td><span style="display:inline-block; width:15px; height:15px; background-color:lightpink; border:1px solid black;"></span> Pi-Alkyl</td></tr><tr><td><span style="display:inline-block; width:15px; height:15px; background-color:yellow; border:1px solid black;"></span> Sulfur-X</td><td></td></tr></table> | <span style="display:inline-block; width:15px; height:15px; background-color:lightgreen; border:1px solid black;"></span> van der Waals | <span style="display:inline-block; width:15px; height:15px; background-color:purple; border:1px solid black;"></span> Pi-Sigma | <span style="display:inline-block; width:15px; height:15px; background-color:red; border:1px solid black;"></span> Conventional Hydrogen Bond | <span style="display:inline-block; width:15px; height:15px; background-color:pink; border:1px solid black;"></span> Alkyl | <span style="display:inline-block; width:15px; height:15px; background-color:lightgreen; border:1px solid black;"></span> Carbon Hydrogen Bond | <span style="display:inline-block; width:15px; height:15px; background-color:lightpink; border:1px solid black;"></span> Pi-Alkyl | <span style="display:inline-block; width:15px; height:15px; background-color:yellow; border:1px solid black;"></span> Sulfur-X |  |
| <span style="display:inline-block; width:15px; height:15px; background-color:lightgreen; border:1px solid black;"></span> van der Waals        | <span style="display:inline-block; width:15px; height:15px; background-color:purple; border:1px solid black;"></span> Pi-Sigma    |                                                                                                                                                                                                                                                                                                                                                                                                                                                                                                                                                                                                                                                                                                                                                                                                                                                                                                                                                                                                                                                                                                                                                                                                   |                                                                                                                                         |                                                                                                                                |                                                                                                                                               |                                                                                                                           |                                                                                                                                                |                                                                                                                                   |                                                                                                                                |  |
| <span style="display:inline-block; width:15px; height:15px; background-color:red; border:1px solid black;"></span> Conventional Hydrogen Bond  | <span style="display:inline-block; width:15px; height:15px; background-color:pink; border:1px solid black;"></span> Alkyl         |                                                                                                                                                                                                                                                                                                                                                                                                                                                                                                                                                                                                                                                                                                                                                                                                                                                                                                                                                                                                                                                                                                                                                                                                   |                                                                                                                                         |                                                                                                                                |                                                                                                                                               |                                                                                                                           |                                                                                                                                                |                                                                                                                                   |                                                                                                                                |  |
| <span style="display:inline-block; width:15px; height:15px; background-color:lightgreen; border:1px solid black;"></span> Carbon Hydrogen Bond | <span style="display:inline-block; width:15px; height:15px; background-color:lightpink; border:1px solid black;"></span> Pi-Alkyl |                                                                                                                                                                                                                                                                                                                                                                                                                                                                                                                                                                                                                                                                                                                                                                                                                                                                                                                                                                                                                                                                                                                                                                                                   |                                                                                                                                         |                                                                                                                                |                                                                                                                                               |                                                                                                                           |                                                                                                                                                |                                                                                                                                   |                                                                                                                                |  |
| <span style="display:inline-block; width:15px; height:15px; background-color:yellow; border:1px solid black;"></span> Sulfur-X                 |                                                                                                                                   |                                                                                                                                                                                                                                                                                                                                                                                                                                                                                                                                                                                                                                                                                                                                                                                                                                                                                                                                                                                                                                                                                                                                                                                                   |                                                                                                                                         |                                                                                                                                |                                                                                                                                               |                                                                                                                           |                                                                                                                                                |                                                                                                                                   |                                                                                                                                |  |
| Control                                                                                                                                        |                                                                                                                                   |                                                                                                                                                                                                                                                                                                                                                                                                                                                                                                                                                                                                                                                                                                                                                                                                                                                                                                                                                                                                                                                                                                                                                                                                   |                                                                                                                                         |                                                                                                                                |                                                                                                                                               |                                                                                                                           |                                                                                                                                                |                                                                                                                                   |                                                                                                                                |  |



|                                                                                                              |                                                                                                    |                                                                                                                                                                                                                                                                                                                                                                                                                                                                                                                                                                                                   |                                                                                                 |                                                                                                   |                                                                                                              |                                                                                                    |
|--------------------------------------------------------------------------------------------------------------|----------------------------------------------------------------------------------------------------|---------------------------------------------------------------------------------------------------------------------------------------------------------------------------------------------------------------------------------------------------------------------------------------------------------------------------------------------------------------------------------------------------------------------------------------------------------------------------------------------------------------------------------------------------------------------------------------------------|-------------------------------------------------------------------------------------------------|---------------------------------------------------------------------------------------------------|--------------------------------------------------------------------------------------------------------------|----------------------------------------------------------------------------------------------------|
| 1                                                                                                            | Quercetin                                                                                          | 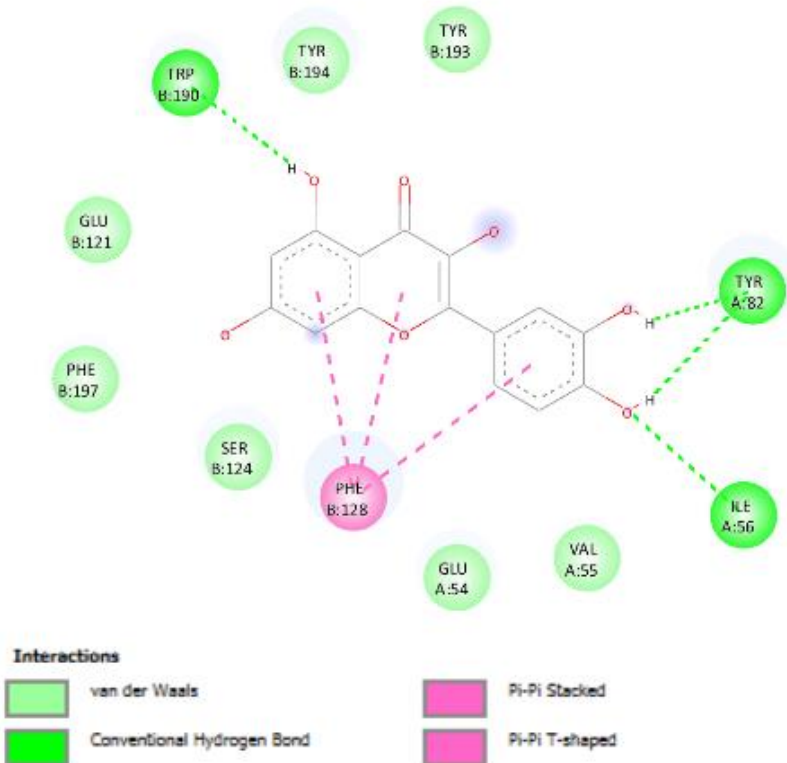 <p><b>Interactions</b></p> <table><tr><td> van der Waals</td><td> Pi-Pi Stacked</td></tr><tr><td> Conventional Hydrogen Bond</td><td> Pi-Pi T-shaped</td></tr></table> |  van der Waals |  Pi-Pi Stacked |  Conventional Hydrogen Bond |  Pi-Pi T-shaped |
|  van der Waals              |  Pi-Pi Stacked  |                                                                                                                                                                                                                                                                                                                                                                                                                                                                                                                                                                                                   |                                                                                                 |                                                                                                   |                                                                                                              |                                                                                                    |
|  Conventional Hydrogen Bond |  Pi-Pi T-shaped |                                                                                                                                                                                                                                                                                                                                                                                                                                                                                                                                                                                                   |                                                                                                 |                                                                                                   |                                                                                                              |                                                                                                    |
| aCSE                                                                                                         |                                                                                                    |                                                                                                                                                                                                                                                                                                                                                                                                                                                                                                                                                                                                   |                                                                                                 |                                                                                                   |                                                                                                              |                                                                                                    |

1

Epicatechin

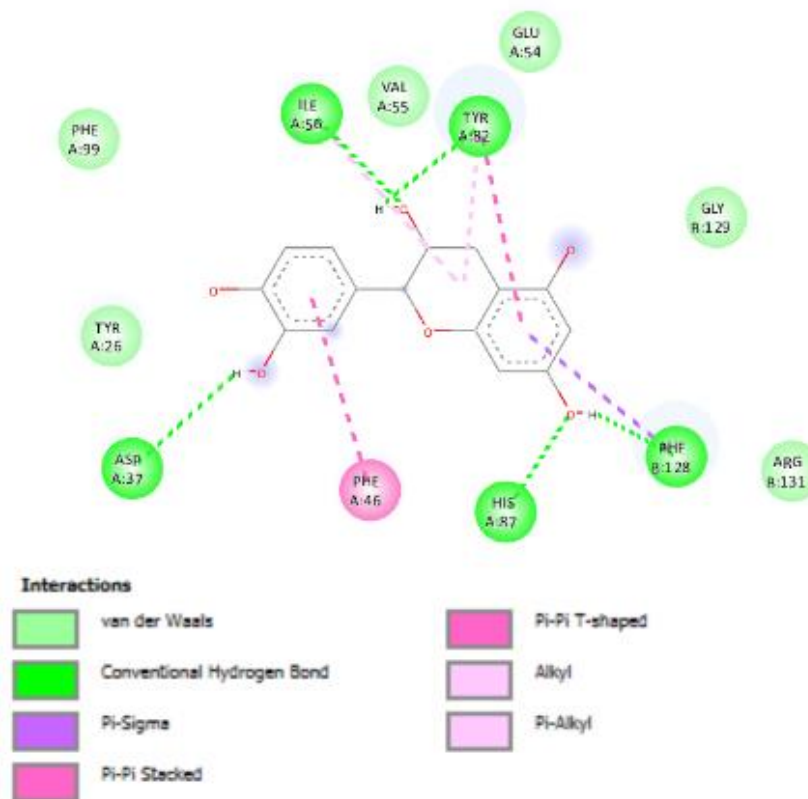

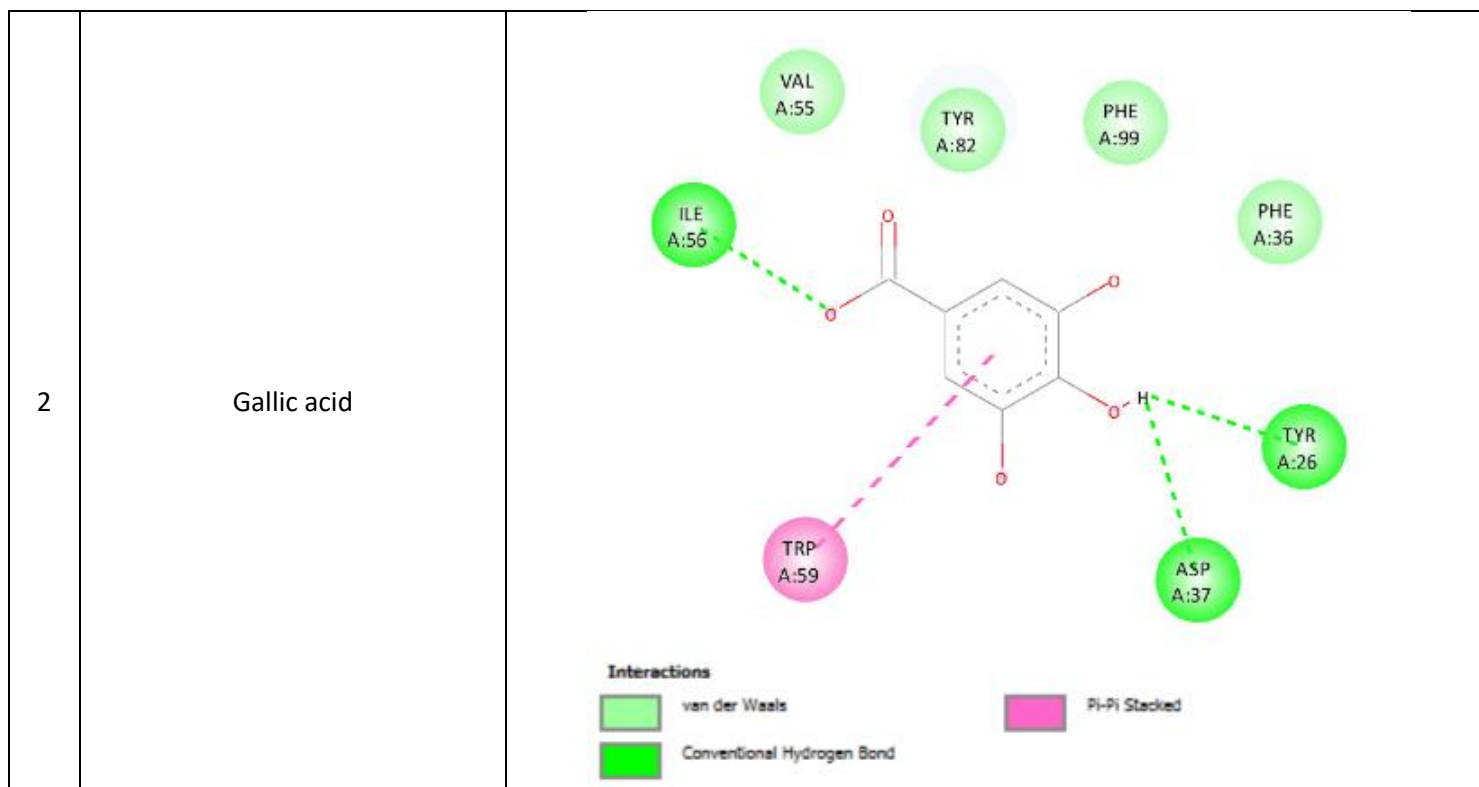

|   |                        |
|---|------------------------|
| 3 | 4-Hydroxycinnamic acid |
|---|------------------------|

4-Hydroxycinnamic acid

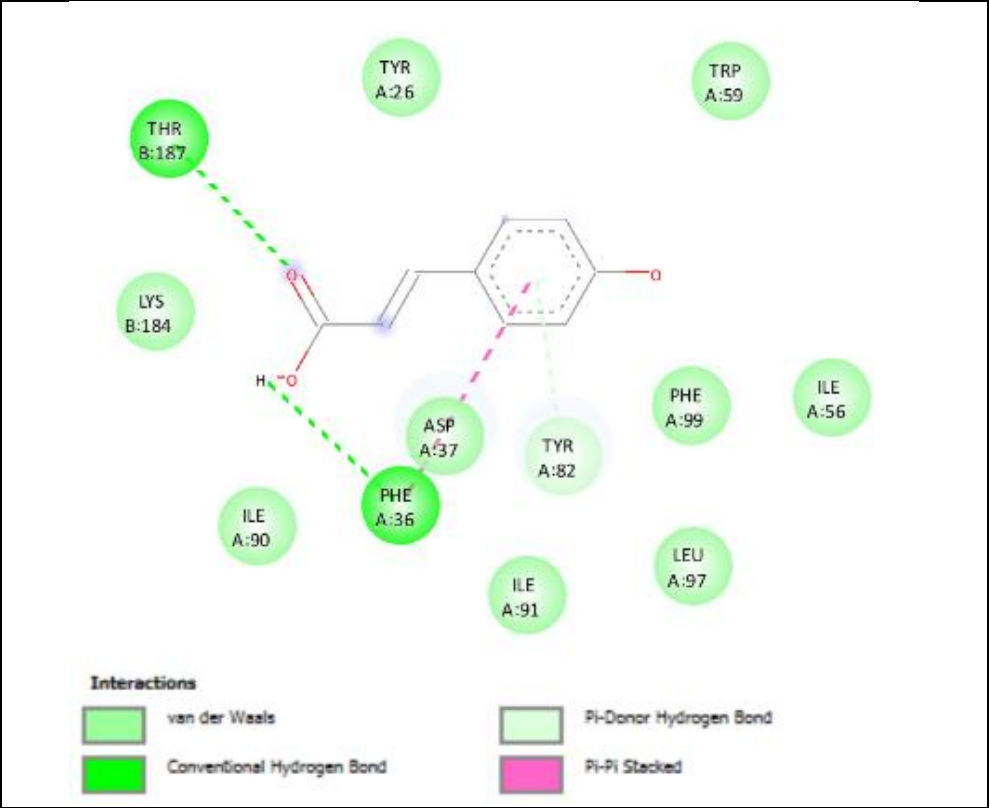

4

Kaempferol

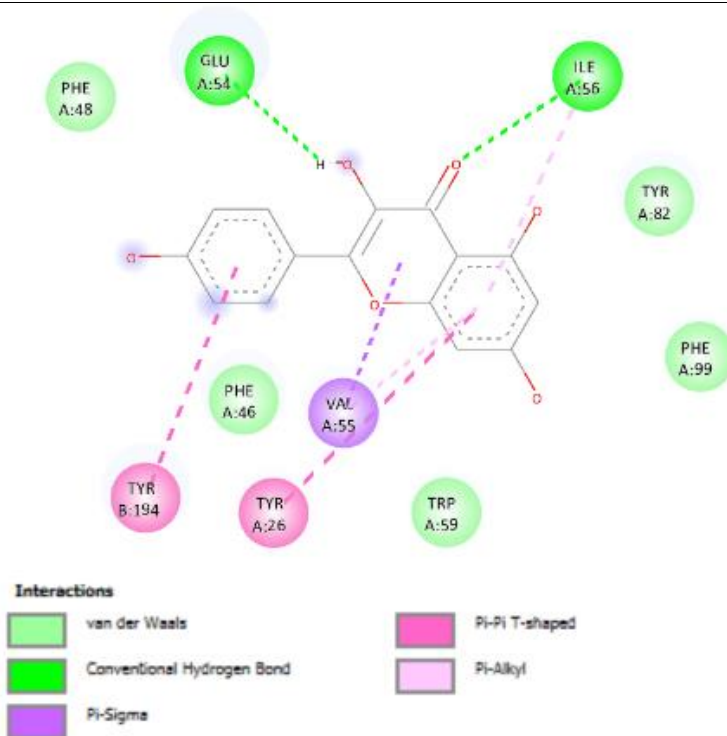

5

Quercitrin

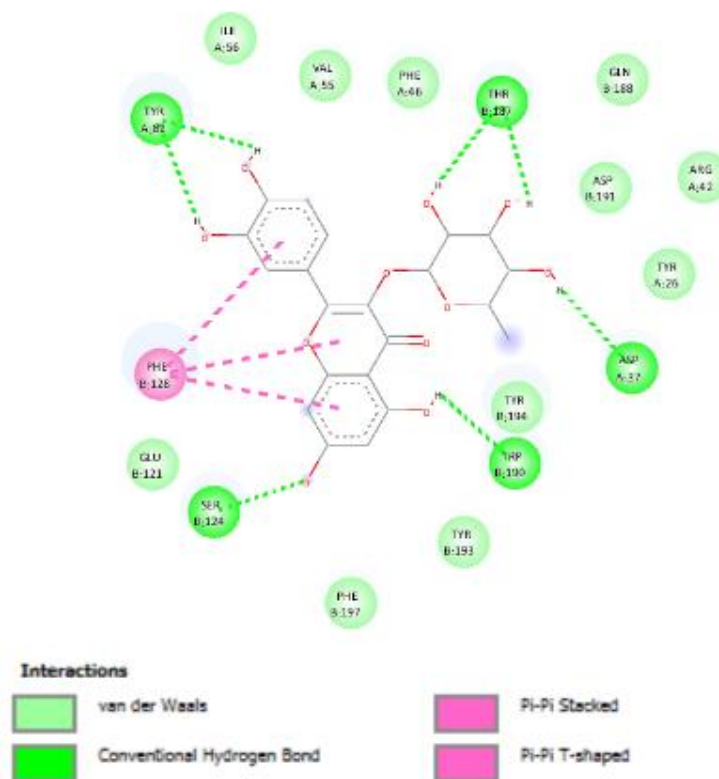

rCSE

1

Caffeic acid

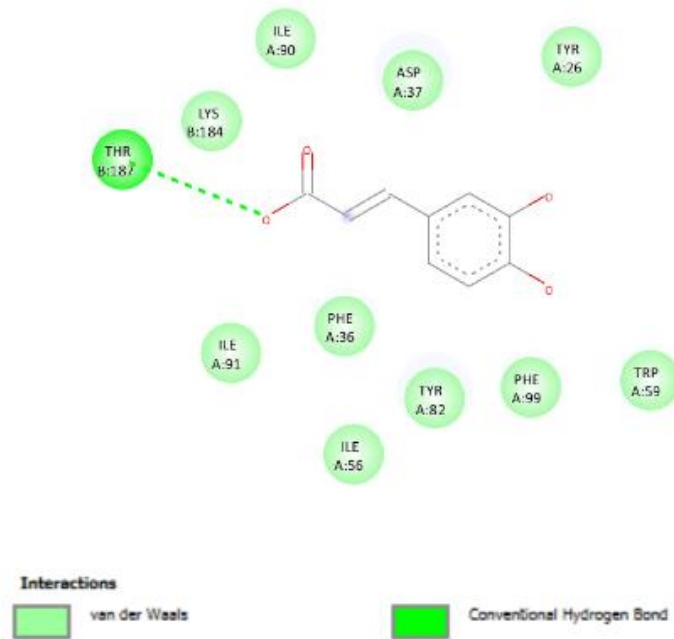

2

(+) -Catechin

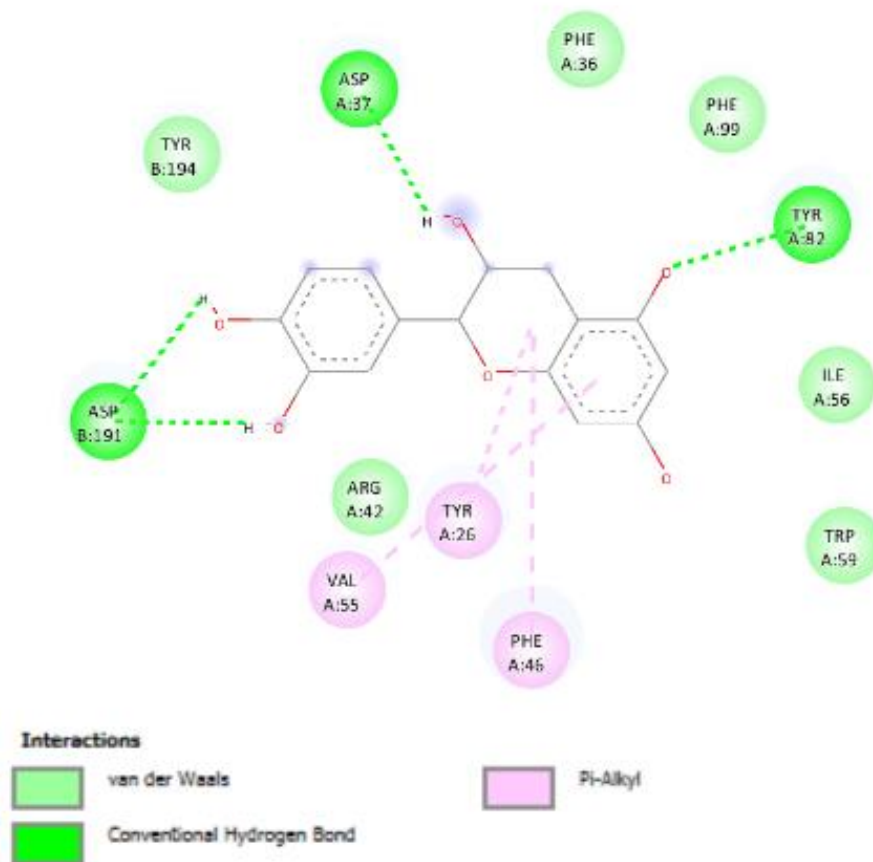



3

(2R,3S,4S,5R,6S)-2-(hydroxymethyl)-6-[7-hydroxy-3-[(2S,3R,4S,5S,6R)-3,4,5-trihydroxy-6-(hydroxymethyl)oxan-2-yl]oxy-2-(3,4,5-trihydroxyphenyl)chromenylium-5-yl]oxyoxane-3,4,5-triol

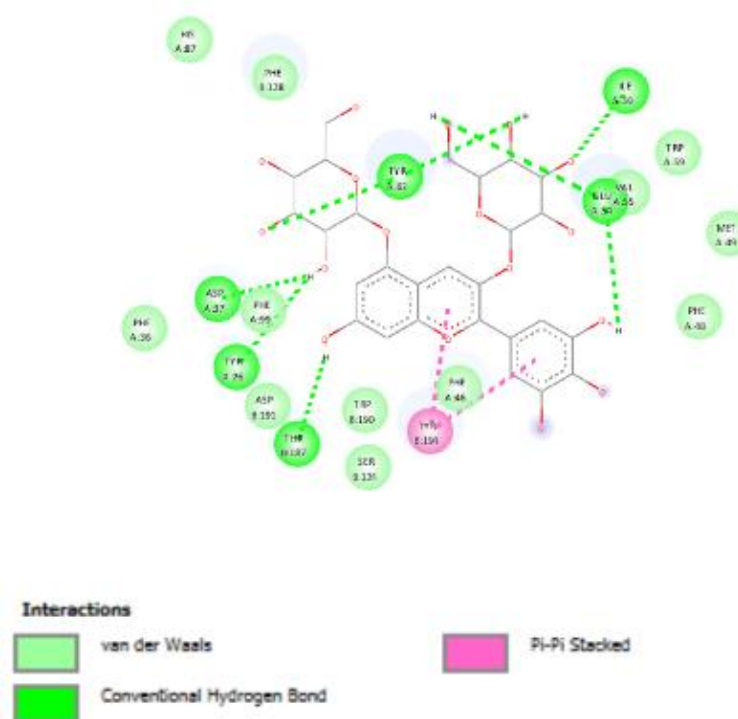

4

Naringin

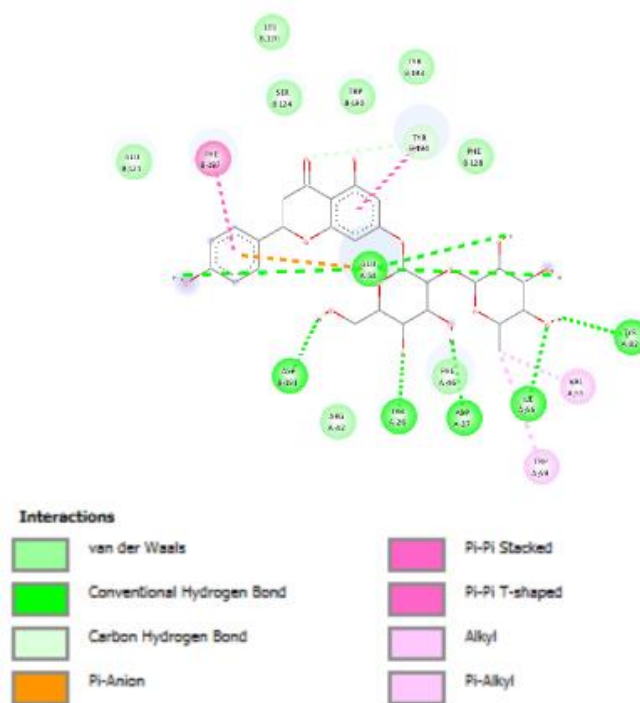

5

Rutin

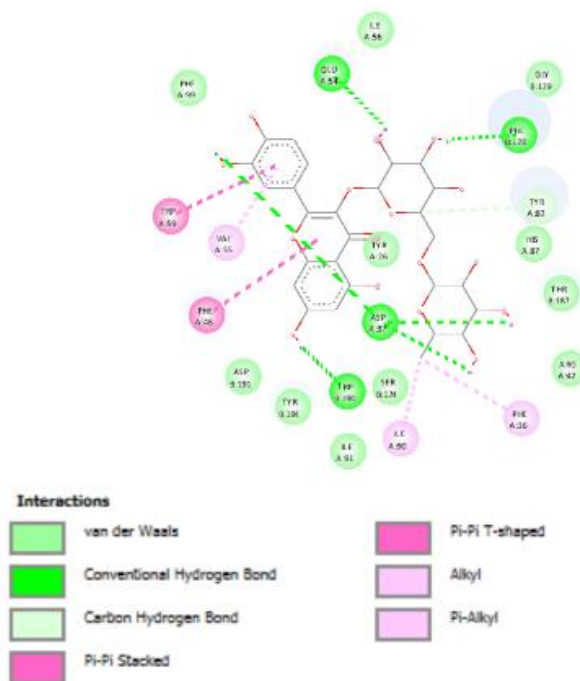

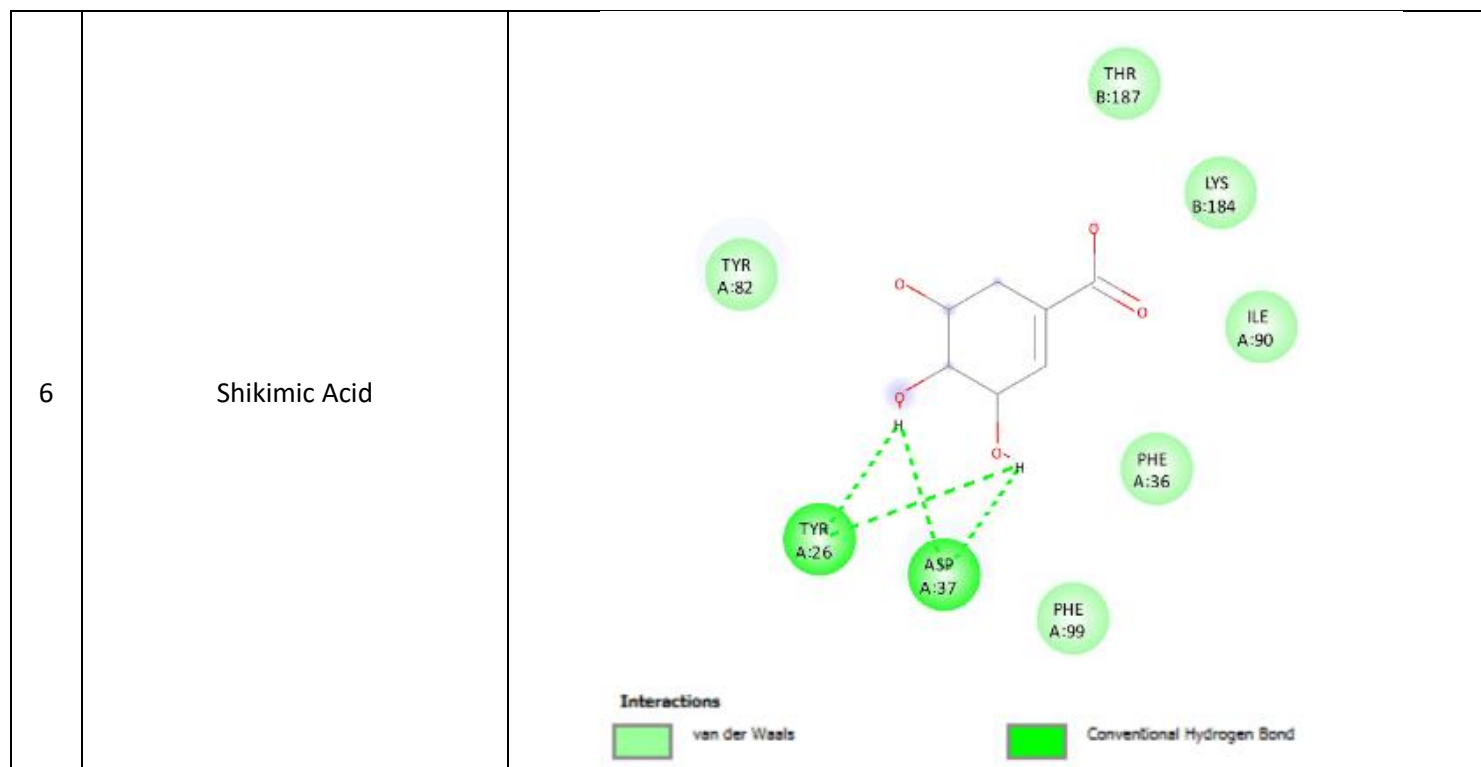

## ROS1 Kinase

| No. | Substance     | Visualization |
|-----|---------------|---------------|
|     | Native Ligand |               |

|                                                                                                                                                     |                                                                                                                                   |                                                                                                                                                                                                                                                                                                                                                                                                                                                                                                                                                                                                                                                                                                                                                                                                                                                                                                                                                                                                                                                                                                                                                                                                                 |                                                                                                                                         |                                                                                                                                |                                                                                                                                                     |                                                                                                                           |                                                                                                                                                |                                                                                                                                   |                                                                                                                                        |  |
|-----------------------------------------------------------------------------------------------------------------------------------------------------|-----------------------------------------------------------------------------------------------------------------------------------|-----------------------------------------------------------------------------------------------------------------------------------------------------------------------------------------------------------------------------------------------------------------------------------------------------------------------------------------------------------------------------------------------------------------------------------------------------------------------------------------------------------------------------------------------------------------------------------------------------------------------------------------------------------------------------------------------------------------------------------------------------------------------------------------------------------------------------------------------------------------------------------------------------------------------------------------------------------------------------------------------------------------------------------------------------------------------------------------------------------------------------------------------------------------------------------------------------------------|-----------------------------------------------------------------------------------------------------------------------------------------|--------------------------------------------------------------------------------------------------------------------------------|-----------------------------------------------------------------------------------------------------------------------------------------------------|---------------------------------------------------------------------------------------------------------------------------|------------------------------------------------------------------------------------------------------------------------------------------------|-----------------------------------------------------------------------------------------------------------------------------------|----------------------------------------------------------------------------------------------------------------------------------------|--|
| 1                                                                                                                                                   | 3ZBF                                                                                                                              | 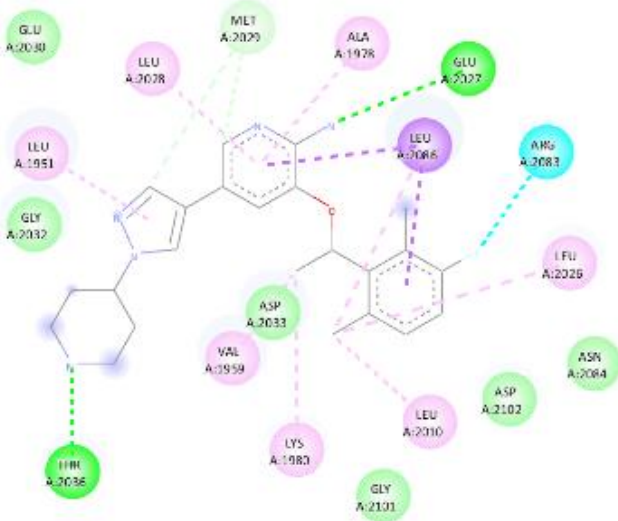 <p><b>Interactions</b></p> <table><tr><td><span style="display:inline-block; width:15px; height:15px; background-color:lightgreen; border:1px solid black;"></span> van der Waals</td><td><span style="display:inline-block; width:15px; height:15px; background-color:purple; border:1px solid black;"></span> Pi-Sigma</td></tr><tr><td><span style="display:inline-block; width:15px; height:15px; background-color:darkgreen; border:1px solid black;"></span> Conventional Hydrogen Bond</td><td><span style="display:inline-block; width:15px; height:15px; background-color:pink; border:1px solid black;"></span> Alkyl</td></tr><tr><td><span style="display:inline-block; width:15px; height:15px; background-color:lightgreen; border:1px solid black;"></span> Carbon Hydrogen Bond</td><td><span style="display:inline-block; width:15px; height:15px; background-color:lightpink; border:1px solid black;"></span> Pi-Alkyl</td></tr><tr><td><span style="display:inline-block; width:15px; height:15px; background-color:cyan; border:1px solid black;"></span> Halogen (Fluorine)</td><td></td></tr></table> | <span style="display:inline-block; width:15px; height:15px; background-color:lightgreen; border:1px solid black;"></span> van der Waals | <span style="display:inline-block; width:15px; height:15px; background-color:purple; border:1px solid black;"></span> Pi-Sigma | <span style="display:inline-block; width:15px; height:15px; background-color:darkgreen; border:1px solid black;"></span> Conventional Hydrogen Bond | <span style="display:inline-block; width:15px; height:15px; background-color:pink; border:1px solid black;"></span> Alkyl | <span style="display:inline-block; width:15px; height:15px; background-color:lightgreen; border:1px solid black;"></span> Carbon Hydrogen Bond | <span style="display:inline-block; width:15px; height:15px; background-color:lightpink; border:1px solid black;"></span> Pi-Alkyl | <span style="display:inline-block; width:15px; height:15px; background-color:cyan; border:1px solid black;"></span> Halogen (Fluorine) |  |
| <span style="display:inline-block; width:15px; height:15px; background-color:lightgreen; border:1px solid black;"></span> van der Waals             | <span style="display:inline-block; width:15px; height:15px; background-color:purple; border:1px solid black;"></span> Pi-Sigma    |                                                                                                                                                                                                                                                                                                                                                                                                                                                                                                                                                                                                                                                                                                                                                                                                                                                                                                                                                                                                                                                                                                                                                                                                                 |                                                                                                                                         |                                                                                                                                |                                                                                                                                                     |                                                                                                                           |                                                                                                                                                |                                                                                                                                   |                                                                                                                                        |  |
| <span style="display:inline-block; width:15px; height:15px; background-color:darkgreen; border:1px solid black;"></span> Conventional Hydrogen Bond | <span style="display:inline-block; width:15px; height:15px; background-color:pink; border:1px solid black;"></span> Alkyl         |                                                                                                                                                                                                                                                                                                                                                                                                                                                                                                                                                                                                                                                                                                                                                                                                                                                                                                                                                                                                                                                                                                                                                                                                                 |                                                                                                                                         |                                                                                                                                |                                                                                                                                                     |                                                                                                                           |                                                                                                                                                |                                                                                                                                   |                                                                                                                                        |  |
| <span style="display:inline-block; width:15px; height:15px; background-color:lightgreen; border:1px solid black;"></span> Carbon Hydrogen Bond      | <span style="display:inline-block; width:15px; height:15px; background-color:lightpink; border:1px solid black;"></span> Pi-Alkyl |                                                                                                                                                                                                                                                                                                                                                                                                                                                                                                                                                                                                                                                                                                                                                                                                                                                                                                                                                                                                                                                                                                                                                                                                                 |                                                                                                                                         |                                                                                                                                |                                                                                                                                                     |                                                                                                                           |                                                                                                                                                |                                                                                                                                   |                                                                                                                                        |  |
| <span style="display:inline-block; width:15px; height:15px; background-color:cyan; border:1px solid black;"></span> Halogen (Fluorine)              |                                                                                                                                   |                                                                                                                                                                                                                                                                                                                                                                                                                                                                                                                                                                                                                                                                                                                                                                                                                                                                                                                                                                                                                                                                                                                                                                                                                 |                                                                                                                                         |                                                                                                                                |                                                                                                                                                     |                                                                                                                           |                                                                                                                                                |                                                                                                                                   |                                                                                                                                        |  |
| Control                                                                                                                                             |                                                                                                                                   |                                                                                                                                                                                                                                                                                                                                                                                                                                                                                                                                                                                                                                                                                                                                                                                                                                                                                                                                                                                                                                                                                                                                                                                                                 |                                                                                                                                         |                                                                                                                                |                                                                                                                                                     |                                                                                                                           |                                                                                                                                                |                                                                                                                                   |                                                                                                                                        |  |

|      |          |                                                                                                                                                                                                                                                       |
|------|----------|-------------------------------------------------------------------------------------------------------------------------------------------------------------------------------------------------------------------------------------------------------|
| 1    | Luteolin | 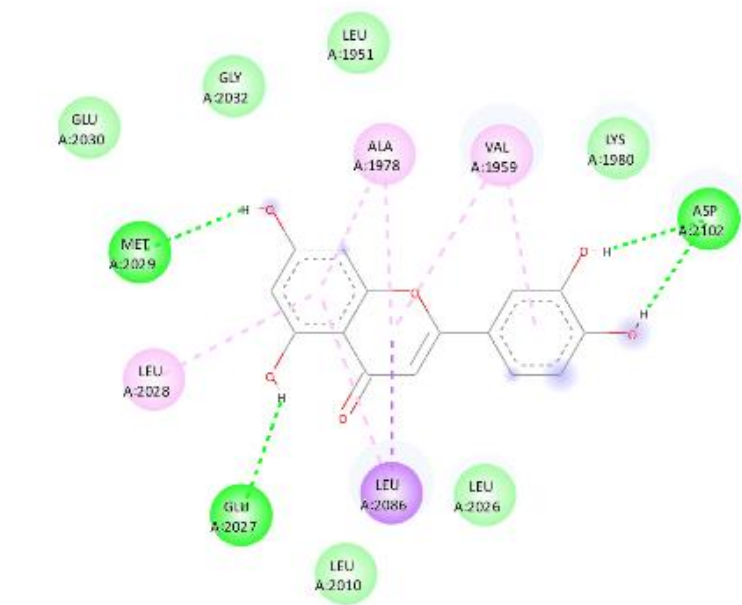 <p><b>Interactions</b></p> <ul style="list-style-type: none"> <li>van der Waals</li> <li>Conventional Hydrogen Bond</li> <li>Pi-Sigma</li> <li>Pi-Alkyl</li> </ul> |
| aCSE |          |                                                                                                                                                                                                                                                       |

1

Epicatechin

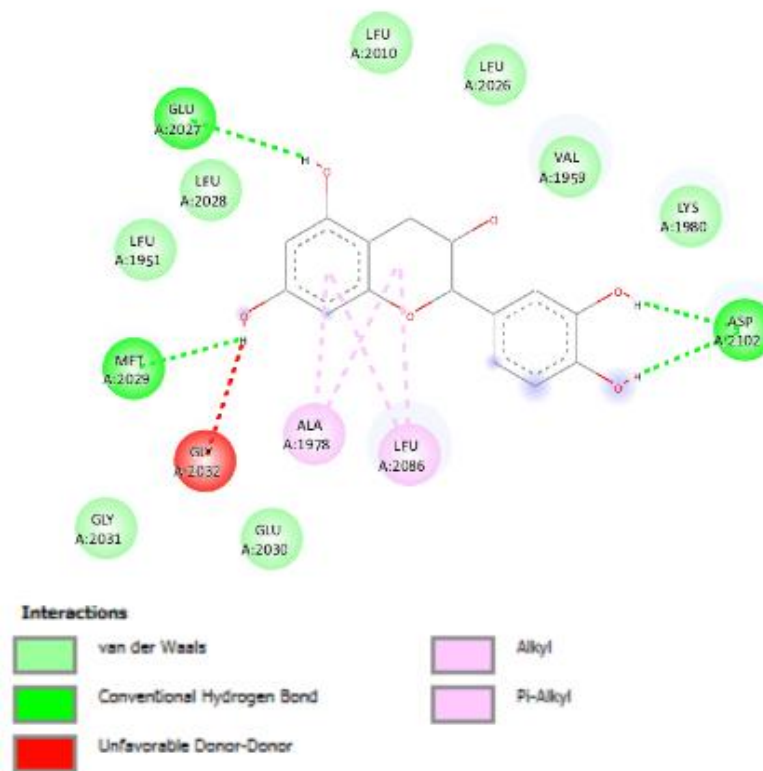

2

Gallic acid

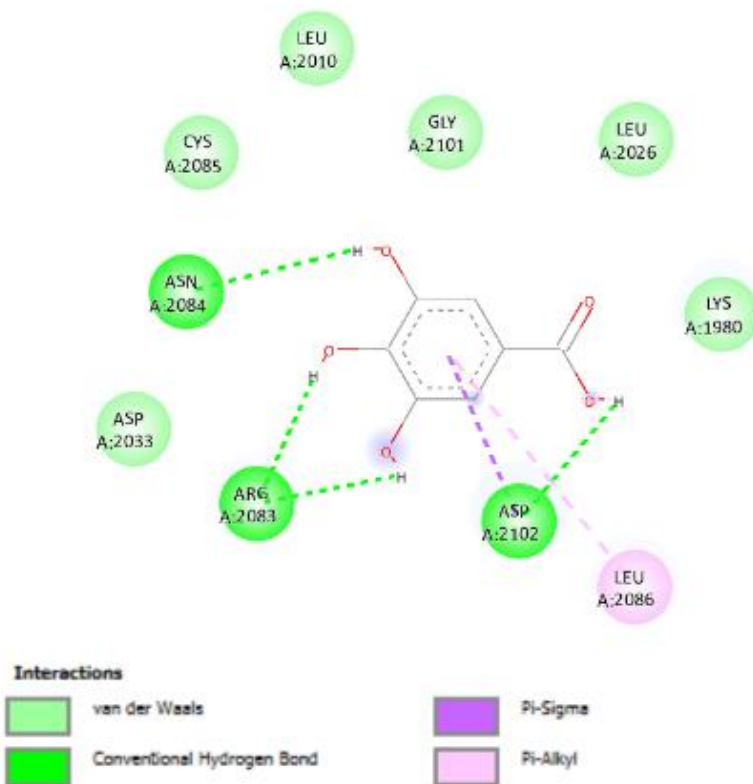



3

4-Hydroxycinnamic acid

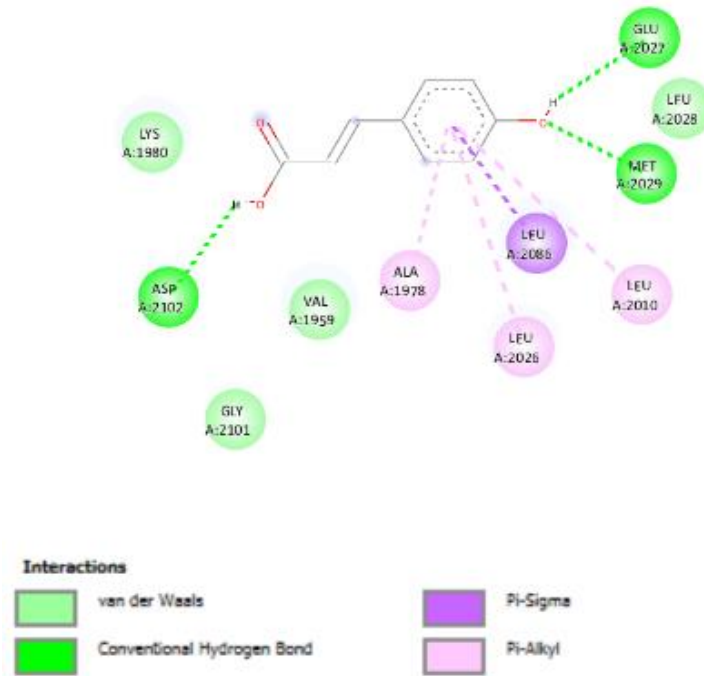

4

Kaempferol

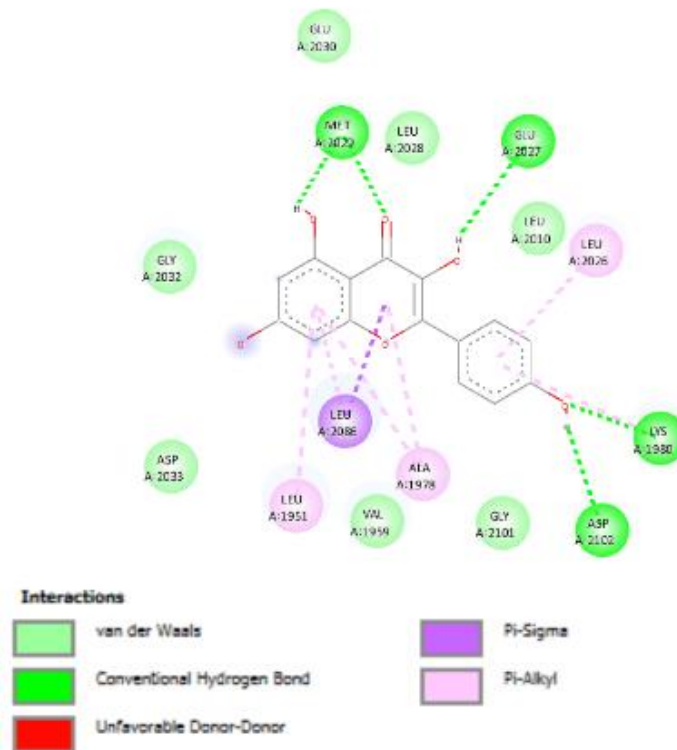

5

Quercitrin

**Interactions**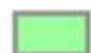

van der Waals

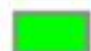

Conventional Hydrogen Bond

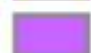

Pi-Sigma

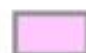

Alkyl

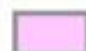

Pi-Alkyl

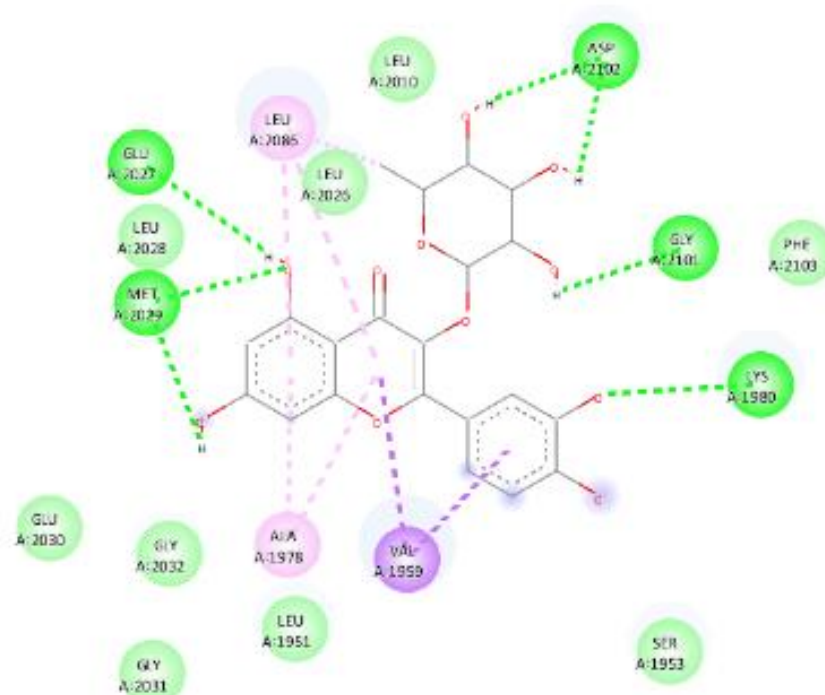

rCSE

1

Caffeic acid

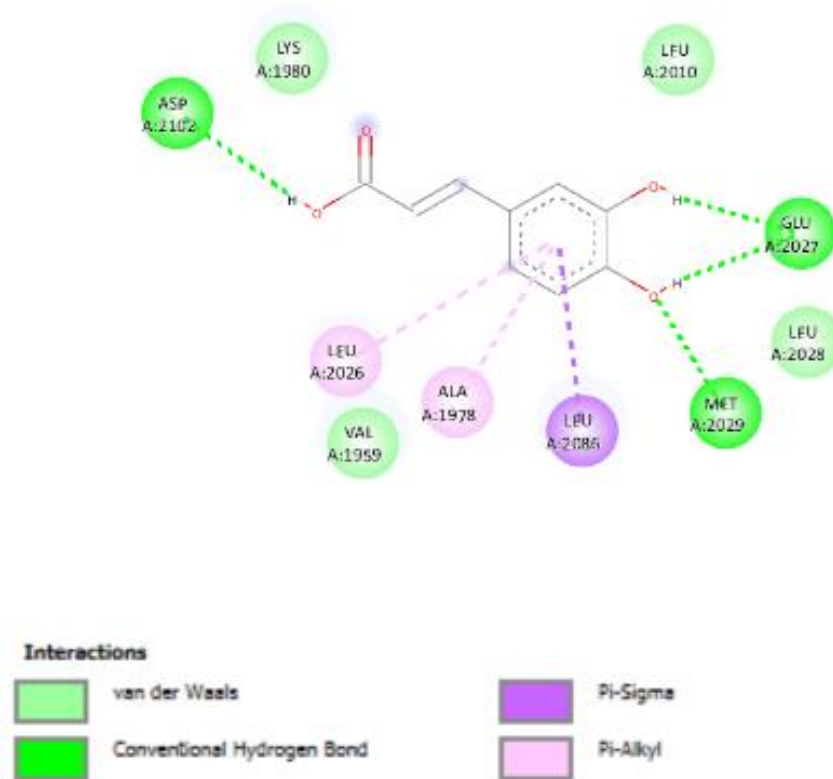

2

(+) -Catechin

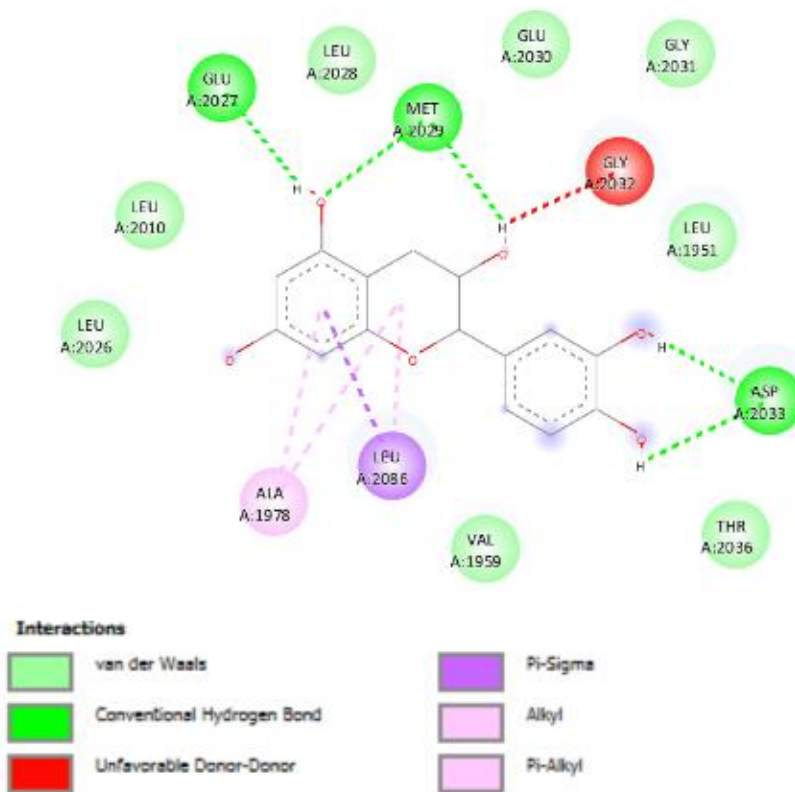

3

(2R,3S,4S,5R,6S)-2-(hydroxymethyl)-6-[7-hydroxy-3-[(2S,3R,4S,5S,6R)-3,4,5-trihydroxy-6-(hydroxymethyl)oxan-2-yl]oxy-2-(3,4,5-trihydroxyphenyl)chromenylum-5-yl]oxyoxane-3,4,5-triol

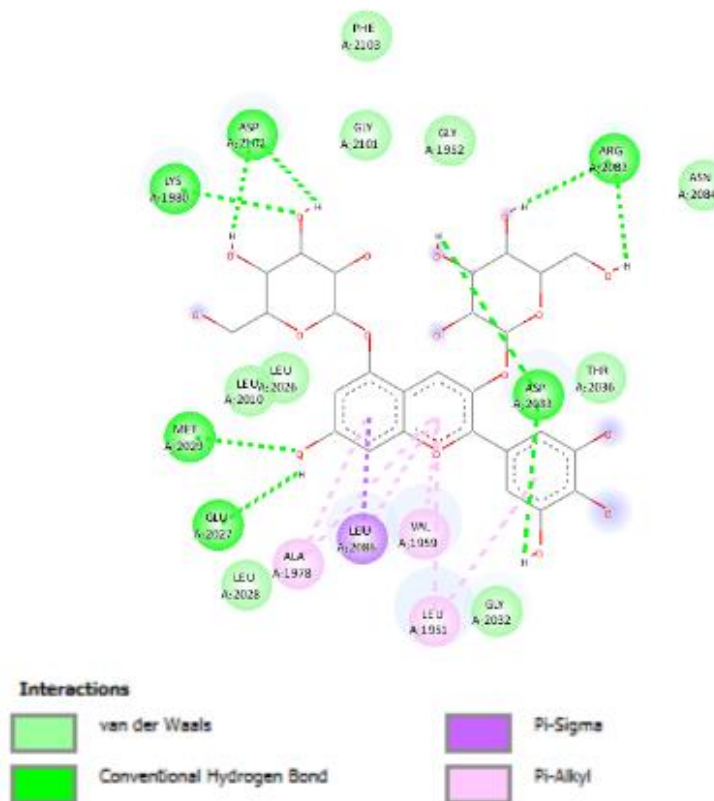

4

Naringin

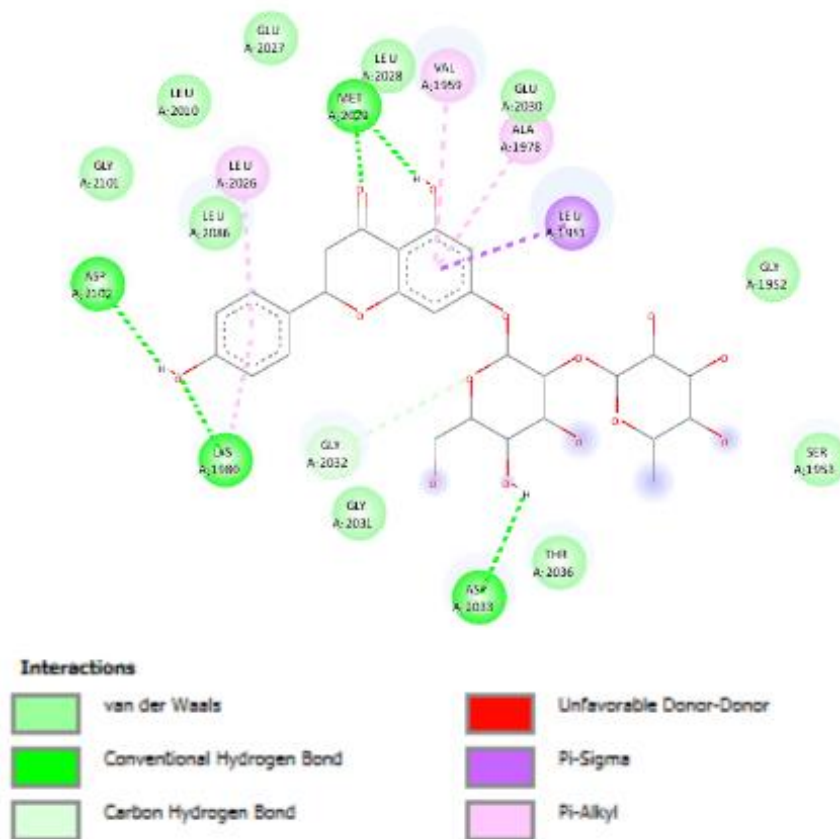

5

Rutin

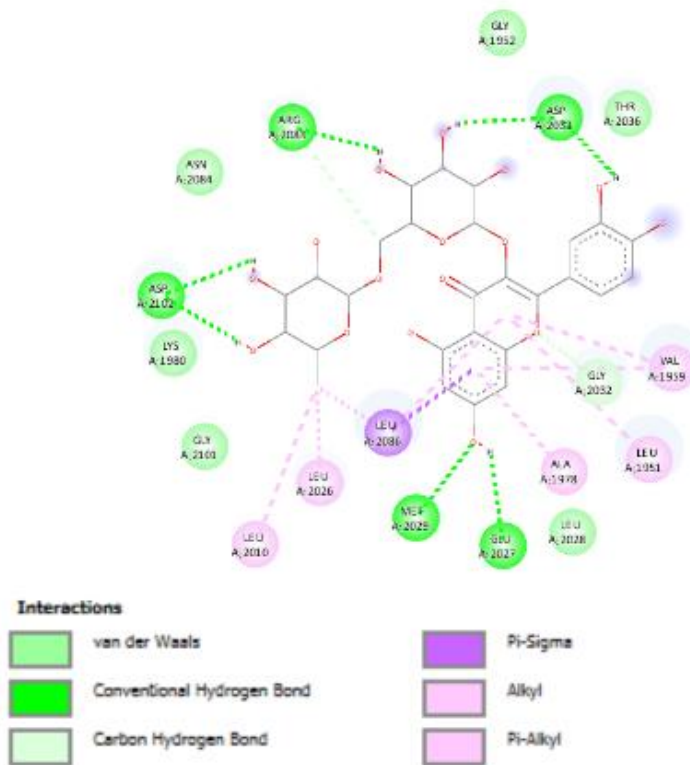



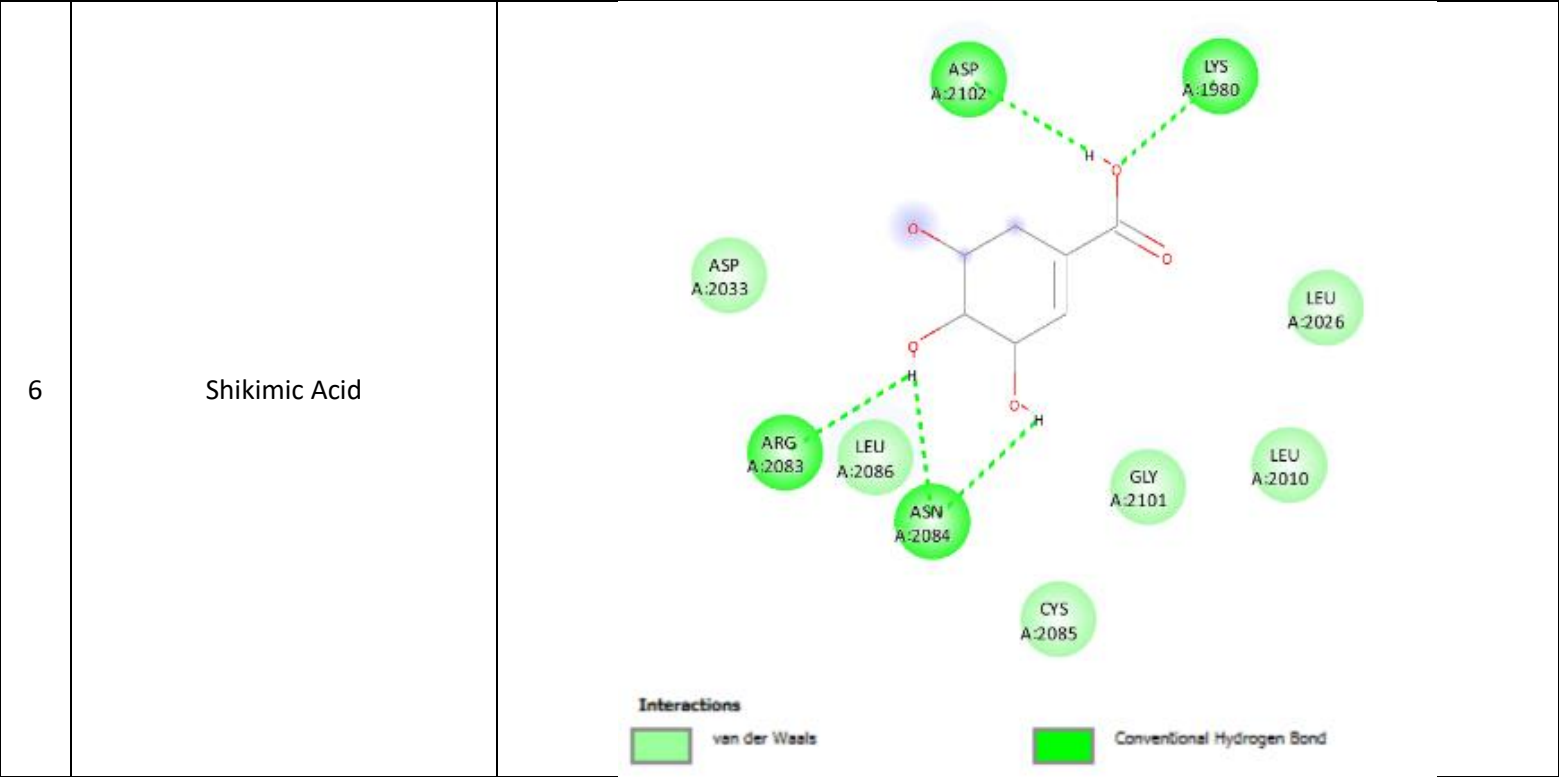

HIF-1alpha

| No. | Substance     | Visualization |
|-----|---------------|---------------|
|     | Native Ligand |               |

|         |      |                                                                                                                                                                                                                                                                                                                                                                                                                                                                                                                                                                                                                                                                                                                                                                                                   |
|---------|------|---------------------------------------------------------------------------------------------------------------------------------------------------------------------------------------------------------------------------------------------------------------------------------------------------------------------------------------------------------------------------------------------------------------------------------------------------------------------------------------------------------------------------------------------------------------------------------------------------------------------------------------------------------------------------------------------------------------------------------------------------------------------------------------------------|
| 1       | 1H2N | 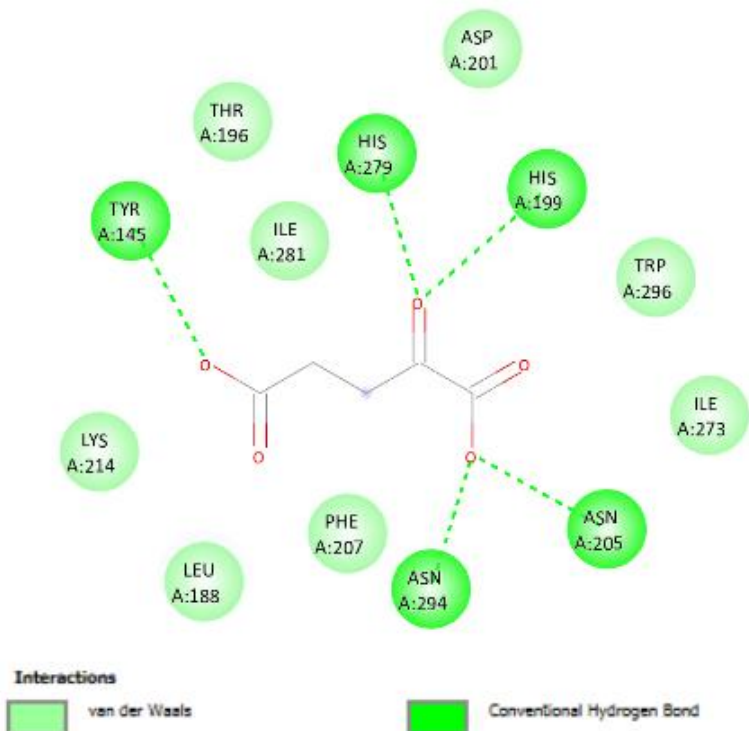 <p>The diagram illustrates the molecular interactions of a central chemical structure, likely a peptide or small molecule, with several amino acid residues. The central structure is shown in a stick representation with red oxygen atoms and blue nitrogen atoms. Surrounding it are green circles representing amino acid residues, each labeled with its three-letter code and residue number (e.g., THR A:196, HIS A:279, ASP A:201, etc.). Dashed green lines indicate conventional hydrogen bonds, while dashed light green lines indicate van der Waals interactions.</p> <p><b>Interactions</b></p> <ul style="list-style-type: none"><li>van der Waals</li><li>Conventional Hydrogen Bond</li></ul> |
| Control |      |                                                                                                                                                                                                                                                                                                                                                                                                                                                                                                                                                                                                                                                                                                                                                                                                   |

1

Genistein

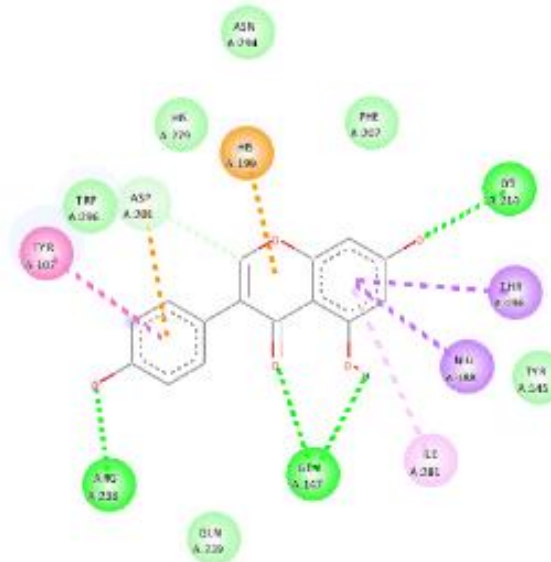**Interactions**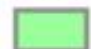

van der Waals

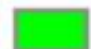

Conventional Hydrogen Bond

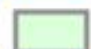

Carbon Hydrogen Bond

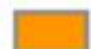

Pi-Cation

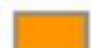

Pi-Anion

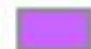

Pi-Sigma

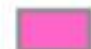

Pi-Pi Stacked

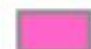

Pi-Pi T-shaped

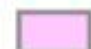

Pi-Alkyl

aCSE

|   |             |
|---|-------------|
| 1 | Epicatechin |
|---|-------------|

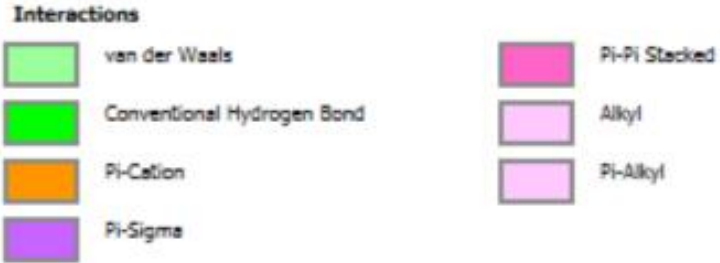

 Pi-Sigma

2

Gallic acid

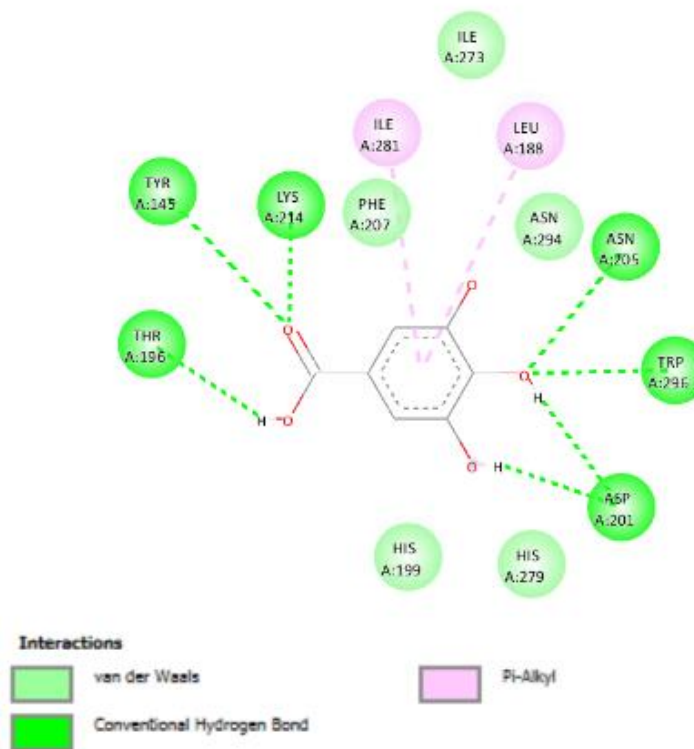

3

4-Hydroxycinnamic acid

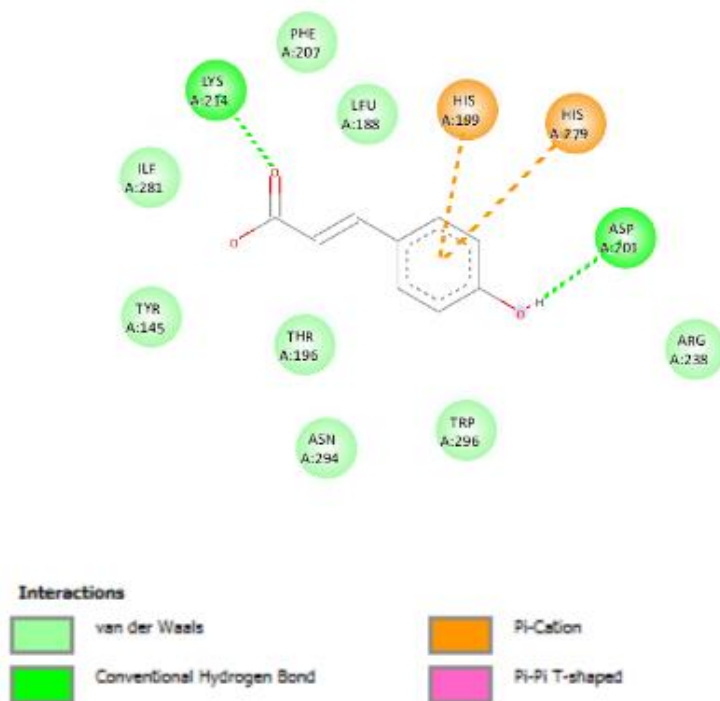

4

Kaempferol

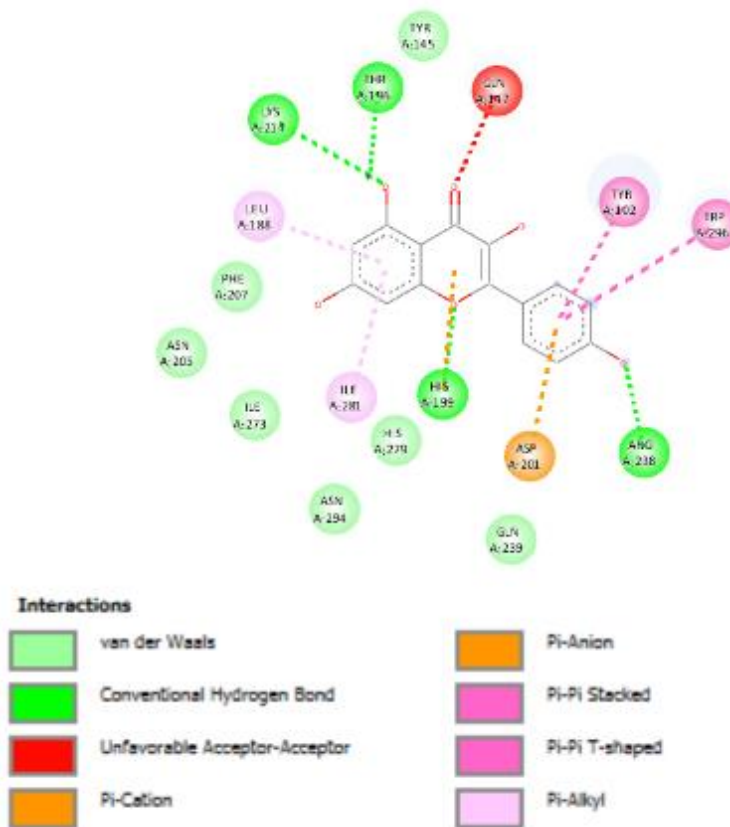

rCSE

|  |
|--|
|  |
|--|

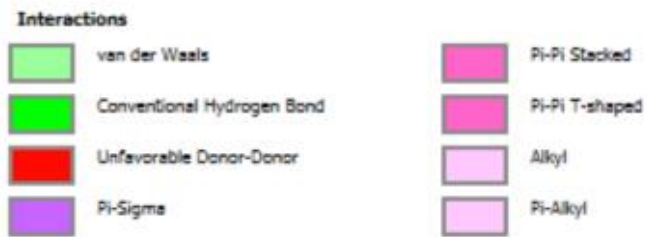



1

Caffeic acid

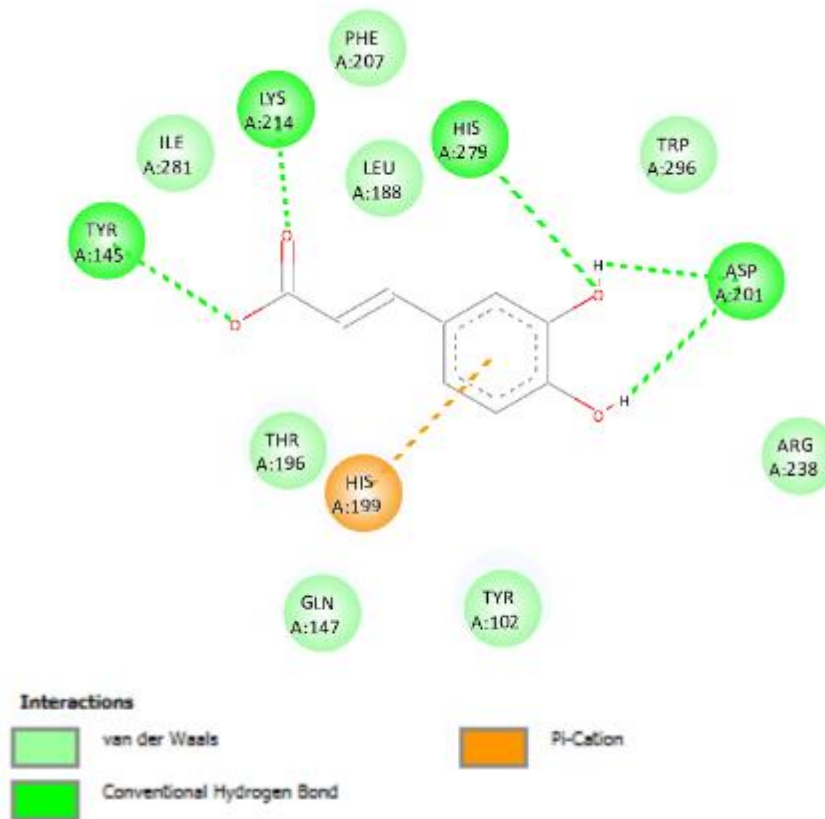

2

(+) -Catechin

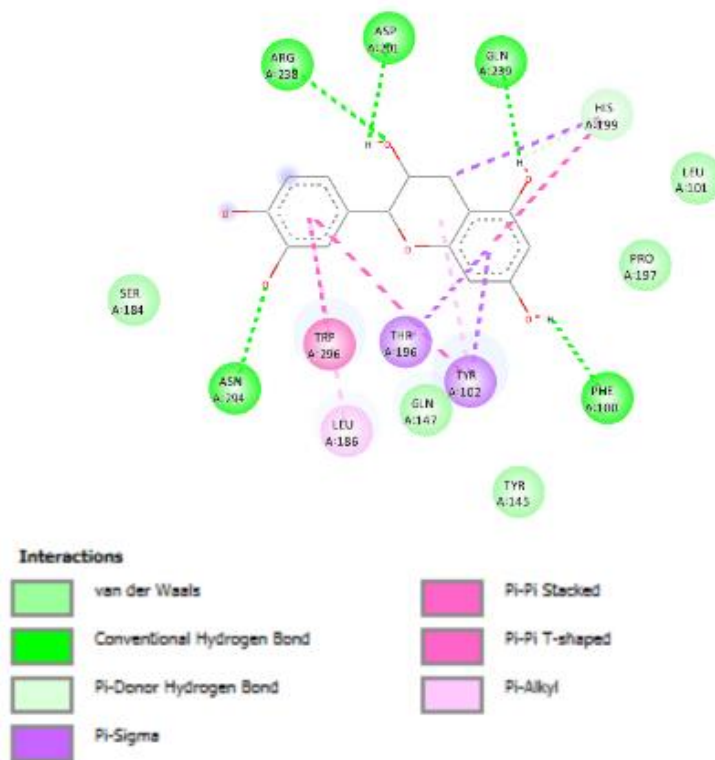

3

(2R,3S,4S,5R,6S)-2-(hydroxymethyl)-6-[7-hydroxy-3-[(2S,3R,4S,5S,6R)-3,4,5-trihydroxy-6-(hydroxymethyl)oxan-2-yl]oxy-2-(3,4,5-trihydroxyphenyl)chromenylium-5-yl]oxyoxane-3,4,5-triol

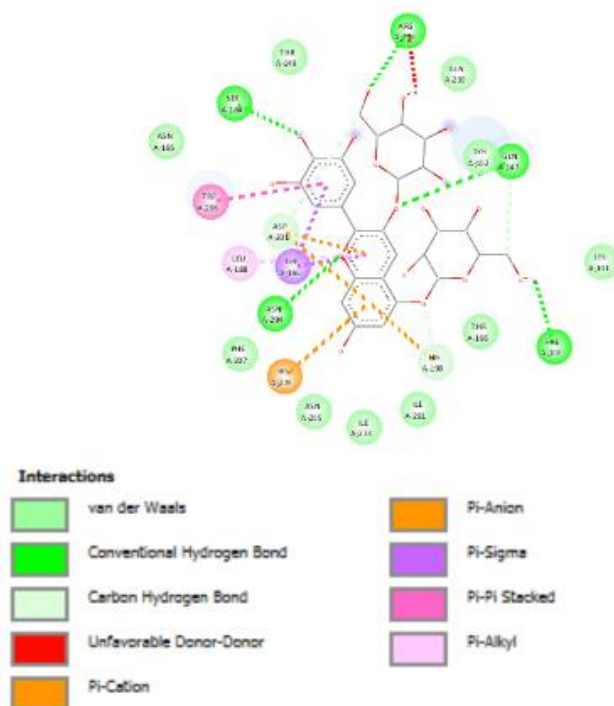

4

Naringin

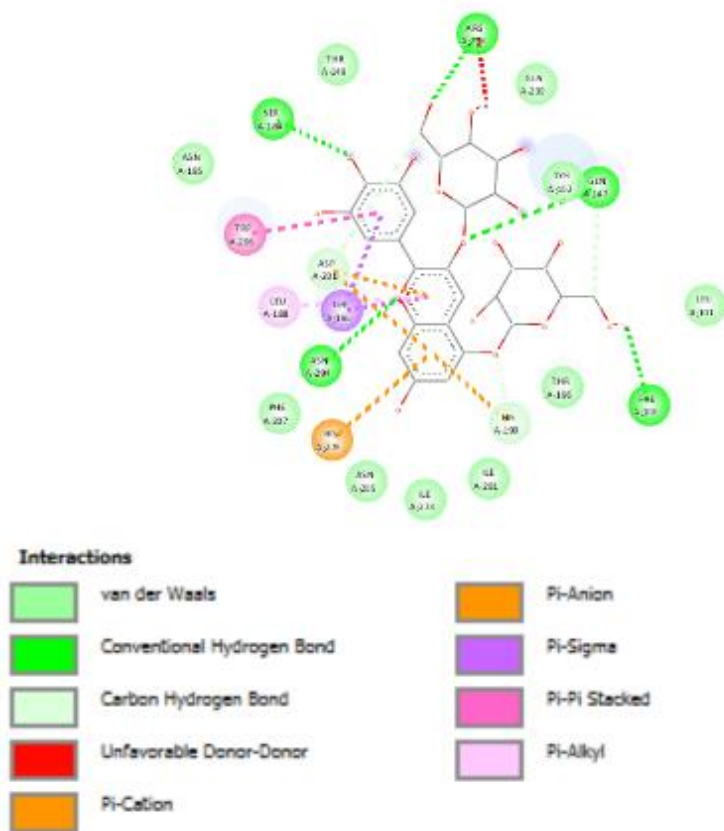

5

Rutin

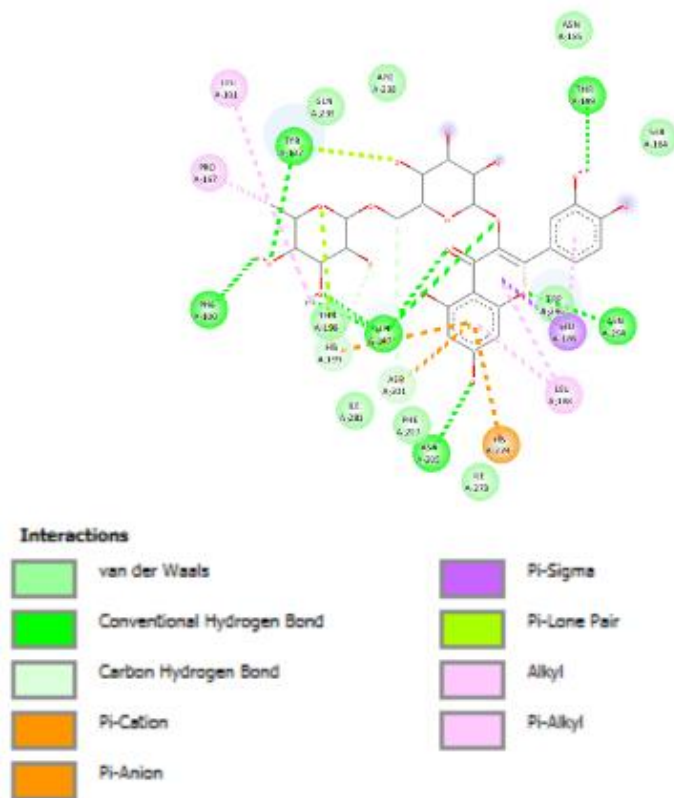

6

Shikimic Acid

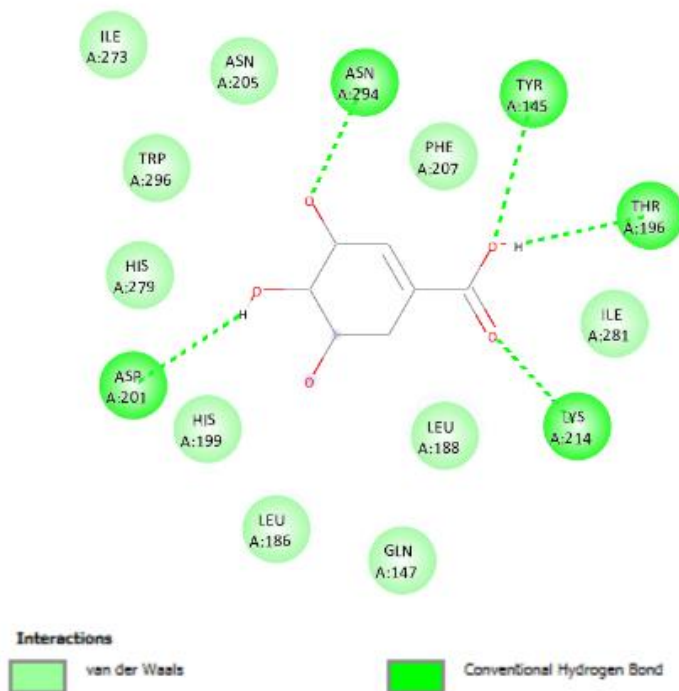

Supplement: s1 [file s1]
